# Supplementary material for: A decision support framework for optimizing career path prediction and vocational mobility of college graduates
Source: PeerJ journal article supplement (doi:10.7717/peerj-cs.3345), 2025-11-06
Supplement: data.xlsx [file data.xlsx]

## Sheet: IVSF-MARCOS
	DM1								DM2								DM3								DM4								DM5										weights
	MD (L)	MD (U)	AD (L)	AD (U)	NMD(L)	NMD(U)	HD(L)	SUM (U)	MD (L)	MD (U)	AD (L)	AD (U)	NMD(L)	NMD(U)	HD(L)	HD(U)	MD (L)	MD (U)	AD (L)	AD (U)	NMD(L)	NMD(U)	HD(L)	HD(U)	MD (L)	MD (U)	AD (L)	AD (U)	NMD(L)	NMD(U)	HD(L)	HD(U)	MD (L)	MD (U)	AD (L)	AD (U)	NMD(L)	NMD(U)	HD(L)	HD(U)			I,I,VI,M,M		DM1
C1	0.6	0.7	0.2	0.25	0.25	0.3		0.6425	0.75	0.85	0.15	0.2	0.1	0.15		0.785	0.85	0.95	0.1	0.15	0.05	0.1		0.935	0.6	0.7	0.2	0.25	0.25	0.3		0.6425	0.85	0.95	0.1	0.15	0.05	0.1		0.935					MD (L)	MD (U)	AD (L)	AD (U)	NMD(L)
C2	0.6	0.7	0.2	0.25	0.25	0.3		0.6425	0.75	0.85	0.15	0.2	0.1	0.15		0.785	0.85	0.95	0.1	0.15	0.05	0.1		0.935	0.6	0.7	0.2	0.25	0.25	0.3		0.6425	0.85	0.95	0.1	0.15	0.05	0.1		0.935					0.75	0.85	0.15	0.2	0.1
C3	0.75	0.85	0.15	0.2	0.1	0.15		0.785	0.75	0.85	0.15	0.2	0.1	0.15		0.785	0.6	0.7	0.2	0.25	0.25	0.3		0.6425	0.75	0.85	0.15	0.2	0.1	0.15		0.785	0.85	0.95	0.1	0.15	0.05	0.1		0.935			O(e)	L	0.21051	0.21051	0.225324	0.176828	0.176828
C4	0.75	0.85	0.15	0.2	0.1	0.15		0.785	0.25	0.35	0.4	0.45	0.45	0.5		0.575	0.6	0.7	0.2	0.25	0.25	0.3		0.6425	0.75	0.85	0.15	0.2	0.1	0.15		0.785	0.6	0.7	0.2	0.25	0.25	0.3		0.6425				U	0.2092	0.2092	0.222678	0.179461	0.179461
C5	0.75	0.85	0.15	0.2	0.1	0.15		0.785	0.25	0.35	0.4	0.45	0.45	0.5		0.575	0.6	0.7	0.2	0.25	0.25	0.3		0.6425	0.75	0.85	0.15	0.2	0.1	0.15		0.785	0.6	0.7	0.2	0.25	0.25	0.3		0.6425
C6	0.4	0.5	0.3	0.35	0.35	0.4		0.5325	0.85	0.95	0.1	0.15	0.05	0.1		0.935	0.85	0.95	0.1	0.15	0.05	0.1		0.935	0.25	0.35	0.4	0.45	0.45	0.5		0.575	0.6	0.7	0.2	0.25	0.25	0.3		0.6425
C7	0.4	0.5	0.3	0.35	0.35	0.4		0.5325	0.85	0.95	0.1	0.15	0.05	0.1		0.935	0.25	0.35	0.4	0.45	0.45	0.5		0.575	0.25	0.35	0.4	0.45	0.45	0.5		0.575	0.75	0.85	0.15	0.2	0.1	0.15		0.785
C8	0.4	0.5	0.3	0.35	0.35	0.4		0.5325	0.85	0.95	0.1	0.15	0.05	0.1		0.935	0.25	0.35	0.4	0.45	0.45	0.5		0.575	0.25	0.35	0.4	0.45	0.45	0.5		0.575	0.75	0.85	0.15	0.2	0.1	0.15		0.785
C9	0.6	0.7	0.2	0.25	0.25	0.3		0.6425	0.6	0.7	0.2	0.25	0.25	0.3		0.6425	0.6	0.7	0.2	0.25	0.25	0.3		0.6425	0.75	0.85	0.15	0.2	0.1	0.15		0.785	0.75	0.85	0.15	0.2	0.1	0.15		0.785
C10	0.6	0.7	0.2	0.25	0.25	0.3		0.6425	0.6	0.7	0.2	0.25	0.25	0.3		0.6425	0.6	0.7	0.2	0.25	0.25	0.3		0.6425	0.75	0.85	0.15	0.2	0.1	0.15		0.785	0.4	0.5	0.3	0.35	0.35	0.4		0.5325
aggregated																						D1	D2	D3	D4	D5
IVSFWA									Weights of the criteria				pi+ (1,0,0)	pi- (0,1,0)				weights			C1	M	I	VI	M	VI
	MD(L)	MD(U)	AD(L)	AD(U)	NMD(L)	NMD(U)				D+L	D+U	D-L	D-U	CW	weights		C1	0.109648			C2	M	I	VI	M	VI
C1	0.760172	0.877017	0.142452	0.194291	0.107914	0.166831			C1	0.299091	0.284089	1.18067	1.22518	0.804893	0.109648		C2	0.109648			C3	I	I	M	I	VI
C2	0.760172	0.877017	0.142452	0.194291	0.107914	0.166831			C2	0.299091	0.284089	1.18067	1.22518	0.804893	0.109648		C3	0.108666			C4	I	VU	M	I	M
C3	0.748475	0.858261	0.148972	0.199613	0.108751	0.162751			C3	0.311904	0.293978	1.17334	1.2155	0.797684	0.108666		C4	0.0953246			C5	I	VU	M	I	M
C4	0.63361	0.740965	0.207017	0.259226	0.198399	0.254996			C4	0.465252	0.446452	1.04254	1.08225	0.69975	0.0953246		C5	0.0953246			C6	UI	VI	VI	VU	M
C5	0.63361	0.740965	0.207017	0.259226	0.198399	0.254996			C5	0.465252	0.446452	1.04254	1.08225	0.69975	0.0953246		C6	0.103021			C7	UI	VI	VU	VU	I
C6	0.704474	0.837709	0.182025	0.239062	0.147641	0.217277			C6	0.377182	0.361522	1.12068	1.17114	0.756245	0.103021		C7	0.0934898			C8	UI	VI	VU	VU	I
C7	0.616774	0.750905	0.236427	0.293334	0.205993	0.274559			C7	0.49517	0.472732	1.03284	1.08451	0.686281	0.0934898		C8	0.0934898			C9	M	M	M	I	I
C8	0.616774	0.750905	0.236427	0.293334	0.205993	0.274559			C8	0.49517	0.472732	1.03284	1.08451	0.686281	0.0934898		C9	0.0988285			C10	M	M	M	I	UI
C9	0.663745	0.768163	0.180653	0.230758	0.180803	0.233924			C9	0.422365	0.402142	1.06971	1.10914	0.725472	0.0988285		C10	0.0925606
C10	0.610047	0.714143	0.204209	0.255137	0.225638	0.278946			C10	0.494649	0.47394	1.00672	1.04643	0.67946	0.0925606
														sum	SUM	1
														7.34071
Alternatives	Experts
		C1						C2						C3						C4						C5						C6						C7						C8
		MD (L)	MD (U)	AD (L)	AD (U)	NMD(L)	NMD(U)	MD (L)	MD (U)	AD (L)	AD (U)	NMD(L)	NMD(U)	MD (L)	MD (U)	AD (L)	AD (U)	NMD(L)	NMD(U)	MD (L)	MD (U)	AD (L)	AD (U)	NMD(L)	NMD(U)	MD (L)	MD (U)	AD (L)	AD (U)	NMD(L)	NMD(U)	MD (L)	MD (U)	AD (L)	AD (U)	NMD(L)	NMD(U)	MD (L)	MD (U)	AD (L)	AD (U)	NMD(L)	NMD(U)	MD (L)	MD (U)	AD (L)	AD (U)	NMD(L)	NMD(U)
A1	DM1	0.35	0.45	0.25	0.3	0.3	0.35	0.55	0.65	0.15	0.2	0.2	0.25	0.65	0.75	0.1	0.15	0.15	0.2	0.35	0.45	0.25	0.3	0.3	0.35	0.45	0.55	0.2	0.25	0.25	0.3	0.15	0.25	0.35	0.4	0.4	0.45	0.55	0.65	0.15	0.2	0.2	0.25	0.85	0.95	0	0.05	0.05	0.1
	DM2	0.75	0.85	0.05	0.1	0.1	0.15	0.25	0.35	0.3	0.35	0.35	0.4	0.45	0.55	0.2	0.25	0.25	0.3	0.35	0.45	0.25	0.3	0.3	0.35	0.85	0.95	0	0.05	0.05	0.1	0.15	0.25	0.35	0.4	0.4	0.45	0.55	0.65	0.15	0.2	0.2	0.25	0.15	0.25	0.35	0.4	0.4	0.45
	DM3	0.75	0.85	0.05	0.1	0.1	0.15	0.25	0.35	0.3	0.35	0.35	0.4	0.45	0.55	0.2	0.25	0.25	0.3	0.35	0.45	0.25	0.3	0.3	0.35	0.85	0.95	0	0.05	0.05	0.1	0.15	0.25	0.35	0.4	0.4	0.45	0.55	0.65	0.15	0.2	0.2	0.25	0.15	0.25	0.35	0.4	0.4	0.45
	DM4	0.75	0.85	0.05	0.1	0.1	0.15	0.25	0.35	0.3	0.35	0.35	0.4	0.55	0.65	0.15	0.2	0.2	0.25	0.15	0.25	0.35	0.4	0.4	0.45	0.85	0.95	0	0.05	0.05	0.1	0.15	0.25	0.35	0.4	0.4	0.45	0.55	0.65	0.15	0.2	0.2	0.25	0.15	0.25	0.35	0.4	0.4	0.45
	DM5	0.45	0.55	0.2	0.25	0.25	0.3	0.25	0.35	0.3	0.35	0.35	0.4	0.85	0.95	0	0.05	0.05	0.1	0.75	0.85	0.05	0.1	0.1	0.15	0.25	0.35	0.3	0.35	0.35	0.4	0.15	0.25	0.35	0.4	0.4	0.45	0.55	0.65	0.15	0.2	0.2	0.25	0.15	0.25	0.35	0.4	0.4	0.45
A1	Aggregated	0.660855	0.769202	0.0896544	0.14833	0.148186	0.202813	0.345081	0.44276	0.25927	0.311332	0.311104	0.362542	0.629478	0.755227	0	0.161696	0.16237	0.219002	0.457347	0.566307	0.19961	0.392084	0.259923	0.314498	0.755116	0.884147	0	0.0992788	0.09898	0.161384	0.15	0.25	0.35	0.4	0.4	0.45	0.55	0.65	0.15	0.2	0.2	0.25	0.500108	0.645062	0	0.258901	0.258197	0.328519
A2	DM1	0.25	0.35	0.3	0.35	0.35	0.4	0.15	0.25	0.35	0.4	0.4	0.45	0.25	0.35	0.3	0.35	0.35	0.4	0.85	0.95	0	0.05	0.05	0.1	0.45	0.55	0.2	0.25	0.25	0.3	0.85	0.95	0	0.05	0.05	0.1	0	0.05	0.45	0.5	0.5	0.55	0.15	0.25	0.35	0.4	0.4	0.45
	DM2	0.25	0.35	0.3	0.35	0.35	0.4	0.15	0.25	0.35	0.4	0.4	0.45	0.25	0.35	0.3	0.35	0.35	0.4	0.55	0.65	0.15	0.2	0.2	0.25	0.25	0.35	0.3	0.35	0.35	0.4	0.55	0.65	0.15	0.2	0.2	0.25	0.35	0.45	0.25	0.3	0.3	0.35	0.15	0.25	0.35	0.4	0.4	0.45
	DM3	0.25	0.35	0.3	0.35	0.35	0.4	0.15	0.25	0.35	0.4	0.4	0.45	0.25	0.35	0.3	0.35	0.35	0.4	0.55	0.65	0.15	0.2	0.2	0.25	0.25	0.35	0.3	0.35	0.35	0.4	0.55	0.65	0.15	0.2	0.2	0.25	0.35	0.45	0.25	0.3	0.3	0.35	0.15	0.25	0.35	0.4	0.4	0.45
	DM4	0.25	0.35	0.3	0.35	0.35	0.4	0.15	0.25	0.35	0.4	0.4	0.45	0.25	0.35	0.3	0.35	0.35	0.4	0.55	0.65	0.15	0.2	0.2	0.25	0.25	0.35	0.3	0.35	0.35	0.4	0.55	0.65	0.15	0.2	0.2	0.25	0.35	0.45	0.25	0.3	0.3	0.35	0.15	0.25	0.35	0.4	0.4	0.45
	DM5	0.45	0.55	0.2	0.25	0.25	0.3	0.25	0.35	0.3	0.35	0.35	0.4	0.85	0.95	0	0.05	0.05	0.1	0.75	0.85	0.05	0.1	0.1	0.15	0.25	0.35	0.3	0.35	0.35	0.4	0.15	0.25	0.35	0.4	0.4	0.45	0.55	0.65	0.15	0.2	0.2	0.25	0.15	0.25	0.35	0.4	0.4	0.45
A2	Aggregated	0.298215	0.397389	0.279244	0.329491	0.329783	0.379873	0.172323	0.271223	0.340588	0.390528	0.390666	0.440588	0.494036	0.639094	0	0.246835	0.248102	0.311899	0.686289	0.806851	0	0.199764	0.132148	0.188312	0.306401	0.404534	0.275456	0.326211	0.326067	0.376637	0.624647	0.752192	0	0.169474	0.168858	0.229352	0.365935	0.459688	0.258493	0.310406	0.310946	0.362167	0.15	0.25	0.354215	0.4	0.4	0.45
A3	DM1	0.05	0.15	0.4	0.45	0.45	0.5	0.45	0.55	0.2	0.25	0.25	0.3	0.55	0.65	0.15	0.2	0.2	0.25	0.75	0.85	0.05	0.1	0.1	0.15	0.55	0.65	0.15	0.2	0.2	0.25	0.25	0.35	0.3	0.35	0.35	0.4	0.65	0.75	0.1	0.15	0.15	0.2	0.25	0.35	0.3	0.35	0.35	0.4
	DM2	0.05	0.15	0.4	0.45	0.45	0.5	0.45	0.55	0.2	0.25	0.25	0.3	0.55	0.65	0.15	0.2	0.2	0.25	0.65	0.75	0.1	0.15	0.15	0.2	0.55	0.65	0.15	0.2	0.2	0.25	0.25	0.35	0.3	0.35	0.35	0.4	0.45	0.55	0.2	0.25	0.25	0.3	0	0.05	0.45	0.5	0.5	0.55
	DM3	0.05	0.15	0.4	0.45	0.45	0.5	0.45	0.55	0.2	0.25	0.25	0.3	0.55	0.65	0.15	0.2	0.2	0.25	0.65	0.75	0.1	0.15	0.15	0.2	0.55	0.65	0.15	0.2	0.2	0.25	0.25	0.35	0.3	0.35	0.35	0.4	0.45	0.55	0.2	0.25	0.25	0.3	0	0.05	0.45	0.5	0.5	0.55
	DM4	0.05	0.15	0.4	0.45	0.45	0.5	0.45	0.55	0.2	0.25	0.25	0.3	0.55	0.65	0.15	0.2	0.2	0.25	0.65	0.75	0.1	0.15	0.15	0.2	0.55	0.65	0.15	0.2	0.2	0.25	0.25	0.35	0.3	0.35	0.35	0.4	0.45	0.55	0.2	0.25	0.25	0.3	0	0.05	0.45	0.5	0.5	0.55
	DM5	0.45	0.55	0.2	0.25	0.25	0.3	0.25	0.35	0.3	0.35	0.35	0.4	0.85	0.95	0	0.05	0.05	0.1	0.75	0.85	0.05	0.1	0.1	0.15	0.25	0.35	0.3	0.35	0.35	0.4	0.15	0.25	0.35	0.4	0.4	0.45	0.55	0.65	0.15	0.2	0.2	0.25	0.15	0.25	0.35	0.4	0.4	0.45
A3	Aggregated	0.202976	0.282749	0.353858	0.40495	0.405577	0.456202	0.423512	0.52265	0.214866	0.265561	0.265326	0.315895	0.638277	0.761793	0	0.155949	0.15652	0.212093	0.693816	0.795895	0.0764539	0.193692	0.128199	0.178843	0.514837	0.614387	0.169559	0.221129	0.220804	0.272002	0.235686	0.334698	0.30829	0.358489	0.358363	0.408545	0.521855	0.623234	0.164273	0.215843	0.215825	0.266731	0.132121	0.199106	0.16854	0.445834	0.445887	0.496352
A4	DM1	0.45	0.55	0.2	0.25	0.25	0.3	0.25	0.35	0.3	0.35	0.35	0.4	0.85	0.95	0	0.05	0.05	0.1	0.75	0.85	0.05	0.1	0.1	0.15	0.25	0.35	0.3	0.35	0.35	0.4	0.15	0.25	0.35	0.4	0.4	0.45	0.55	0.65	0.15	0.2	0.2	0.25	0.15	0.25	0.35	0.4	0.4	0.45
	DM2	0.45	0.55	0.2	0.25	0.25	0.3	0.25	0.35	0.3	0.35	0.35	0.4	0.65	0.75	0.1	0.15	0.15	0.2	0.75	0.85	0.05	0.1	0.1	0.15	0.25	0.35	0.3	0.35	0.35	0.4	0.15	0.25	0.35	0.4	0.4	0.45	0.55	0.65	0.15	0.2	0.2	0.25	0.85	0.95	0	0.05	0.05	0.1
	DM3	0.45	0.55	0.2	0.25	0.25	0.3	0.25	0.35	0.3	0.35	0.35	0.4	0.65	0.75	0.1	0.15	0.15	0.2	0.75	0.85	0.05	0.1	0.1	0.15	0.25	0.35	0.3	0.35	0.35	0.4	0.15	0.25	0.35	0.4	0.4	0.45	0.55	0.65	0.15	0.2	0.2	0.25	0.85	0.95	0	0.05	0.05	0.1
	DM4	0.35	0.45	0.25	0.3	0.3	0.35	0.25	0.35	0.3	0.35	0.35	0.4	0.65	0.75	0.1	0.15	0.15	0.2	0.75	0.85	0.05	0.1	0.1	0.15	0.25	0.35	0.3	0.35	0.35	0.4	0.15	0.25	0.35	0.4	0.4	0.45	0.55	0.65	0.15	0.2	0.2	0.25	0.85	0.95	0	0.05	0.05	0.1
	DM5	0.35	0.45	0.25	0.3	0.3	0.35	0.55	0.65	0.15	0.2	0.2	0.25	0.65	0.75	0.1	0.15	0.15	0.2	0.35	0.45	0.25	0.3	0.3	0.35	0.45	0.55	0.2	0.25	0.25	0.3	0.15	0.25	0.35	0.4	0.4	0.45	0.55	0.65	0.15	0.2	0.2	0.25	0.85	0.95	0	0.05	0.05	0.1
A4	Aggregated	0.418422	0.517821	0.216423	0.266907	0.266651	0.317066	0.332058	0.431243	0.265394	0.316557	0.317024	0.367645	0.710679	0.824873	0	0.1192	0.119029	0.173003	0.710776	0.815241	0.0664611	0.151168	0.121442	0.174634	0.298215	0.397389	0.279244	0.329491	0.329783	0.379873	0.15	0.25	0.35	0.4	0.4	0.45	0.55	0.65	0.15	0.2	0.2	0.25	0.79892	0.918398	0	0.0772497	0.0774603	0.136978
A5	DM1	0.75	0.85	0.05	0.1	0.1	0.15	0.25	0.35	0.3	0.35	0.35	0.4	0.45	0.55	0.2	0.25	0.25	0.3	0.35	0.45	0.25	0.3	0.3	0.35	0.85	0.95	0	0.05	0.05	0.1	0.15	0.25	0.35	0.4	0.4	0.45	0.65	0.75	0.1	0.15	0.15	0.2	0.15	0.25	0.35	0.4	0.4	0.45
	DM2	0.75	0.85	0.05	0.1	0.1	0.15	0.25	0.35	0.3	0.35	0.35	0.4	0.45	0.55	0.2	0.25	0.25	0.3	0.35	0.45	0.25	0.3	0.3	0.35	0.85	0.95	0	0.05	0.05	0.1	0.15	0.25	0.35	0.4	0.4	0.45	0.55	0.65	0.15	0.2	0.2	0.25	0.15	0.25	0.35	0.4	0.4	0.45
	DM3	0.75	0.85	0.05	0.1	0.1	0.15	0.25	0.35	0.3	0.35	0.35	0.4	0.45	0.55	0.2	0.25	0.25	0.3	0.35	0.45	0.25	0.3	0.3	0.35	0.85	0.95	0	0.05	0.05	0.1	0.15	0.25	0.35	0.4	0.4	0.45	0.55	0.65	0.15	0.2	0.2	0.25	0.15	0.25	0.35	0.4	0.4	0.45
	DM4	0.75	0.85	0.05	0.1	0.1	0.15	0.25	0.35	0.3	0.35	0.35	0.4	0.55	0.65	0.15	0.2	0.2	0.25	0.15	0.25	0.35	0.4	0.4	0.45	0.85	0.95	0	0.05	0.05	0.1	0.15	0.25	0.35	0.4	0.4	0.45	0.55	0.65	0.15	0.2	0.2	0.25	0.15	0.25	0.35	0.4	0.4	0.45
	DM5	0.45	0.55	0.2	0.25	0.25	0.3	0.45	0.55	0.2	0.25	0.25	0.3	0.55	0.65	0.15	0.2	0.2	0.25	0.15	0.25	0.35	0.4	0.4	0.45	0.55	0.65	0.15	0.2	0.2	0.25	0	0.05	0.45	0.5	0.5	0.55	0.55	0.65	0.15	0.2	0.2	0.25	0.05	0.15	0.4	0.45	0.45	0.5
A5	Aggregated	0.716586	0.820113	0.0638898	0.117873	0.117589	0.169869	0.298215	0.397389	0.279244	0.329491	0.329783	0.379873	0.489292	0.590083	0.180653	0.230758	0.231029	0.280997	0.297256	0.393491	0.281591	0.392084	0.332129	0.383038	0.820597	0.930501	0	0.0641234	0.0638898	0.117873	0.13623	0.228045	0.365905	0.416343	0.416099	0.466501	0.574175	0.674601	0.137728	0.188318	0.188247	0.238598	0.137815	0.235466	0.301549	0.408545	0.408418	0.45859
A6	DM1	0.25	0.35	0.3	0.35	0.35	0.4	0.15	0.25	0.35	0.4	0.4	0.45	0.25	0.35	0.3	0.35	0.35	0.4	0.85	0.95	0	0.05	0.05	0.1	0.45	0.55	0.2	0.25	0.25	0.3	0.85	0.95	0	0.05	0.05	0.1	0	0.05	0.45	0.5	0.5	0.55	0.15	0.25	0.35	0.4	0.4	0.45
	DM2	0.25	0.35	0.3	0.35	0.35	0.4	0.15	0.25	0.35	0.4	0.4	0.45	0.25	0.35	0.3	0.35	0.35	0.4	0.55	0.65	0.15	0.2	0.2	0.25	0.25	0.35	0.3	0.35	0.35	0.4	0.55	0.65	0.15	0.2	0.2	0.25	0.35	0.45	0.25	0.3	0.3	0.35	0.15	0.25	0.35	0.4	0.4	0.45
	DM3	0.25	0.35	0.3	0.35	0.35	0.4	0.15	0.25	0.35	0.4	0.4	0.45	0.25	0.35	0.3	0.35	0.35	0.4	0.55	0.65	0.15	0.2	0.2	0.25	0.25	0.35	0.3	0.35	0.35	0.4	0.55	0.65	0.15	0.2	0.2	0.25	0.35	0.45	0.25	0.3	0.3	0.35	0.15	0.25	0.35	0.4	0.4	0.45
	DM4	0.25	0.35	0.3	0.35	0.35	0.4	0.15	0.25	0.35	0.4	0.4	0.45	0.25	0.35	0.3	0.35	0.35	0.4	0.55	0.65	0.15	0.2	0.2	0.25	0.25	0.35	0.3	0.35	0.35	0.4	0.55	0.65	0.15	0.2	0.2	0.25	0.35	0.45	0.25	0.3	0.3	0.35	0.15	0.25	0.35	0.4	0.4	0.45
	DM5	0.55	0.65	0.15	0.2	0.2	0.25	0.55	0.65	0.15	0.2	0.2	0.25	0.55	0.65	0.15	0.2	0.2	0.25	0.55	0.65	0.15	0.2	0.2	0.25	0.25	0.35	0.3	0.35	0.35	0.4	0.55	0.65	0.15	0.2	0.2	0.25	0.35	0.45	0.25	0.3	0.3	0.35	0.55	0.65	0.15	0.2	0.2	0.25
A6	Aggregated	0.332058	0.431243	0.265394	0.316557	0.317024	0.367645	0.2813	0.37493	0.3013	0.353213	0.353858	0.40495	0.332058	0.431243	0.265394	0.316557	0.317024	0.367645	0.652313	0.775856	0	0.199764	0.149379	0.206391	0.306401	0.404534	0.275456	0.326211	0.326067	0.376637	0.652313	0.775856	0	0.149651	0.149379	0.206391	0.313091	0.405314	0.282929	0.333835	0.334059	0.384709	0.2813	0.37493	0.314398	0.353213	0.353858	0.40495
A7	DM1	0.05	0.15	0.4	0.45	0.45	0.5	0.45	0.55	0.2	0.25	0.25	0.3	0.55	0.65	0.15	0.2	0.2	0.25	0.75	0.85	0.05	0.1	0.1	0.15	0.55	0.65	0.15	0.2	0.2	0.25	0.25	0.35	0.3	0.35	0.35	0.4	0.65	0.75	0.1	0.15	0.15	0.2	0.25	0.35	0.3	0.35	0.35	0.4
	DM2	0.05	0.15	0.4	0.45	0.45	0.5	0.45	0.55	0.2	0.25	0.25	0.3	0.55	0.65	0.15	0.2	0.2	0.25	0.65	0.75	0.1	0.15	0.15	0.2	0.55	0.65	0.15	0.2	0.2	0.25	0.25	0.35	0.3	0.35	0.35	0.4	0.45	0.55	0.2	0.25	0.25	0.3	0	0.05	0.45	0.5	0.5	0.55
	DM3	0.05	0.15	0.4	0.45	0.45	0.5	0.45	0.55	0.2	0.25	0.25	0.3	0.55	0.65	0.15	0.2	0.2	0.25	0.65	0.75	0.1	0.15	0.15	0.2	0.55	0.65	0.15	0.2	0.2	0.25	0.25	0.35	0.3	0.35	0.35	0.4	0.45	0.55	0.2	0.25	0.25	0.3	0	0.05	0.45	0.5	0.5	0.55
	DM4	0.05	0.15	0.4	0.45	0.45	0.5	0.45	0.55	0.2	0.25	0.25	0.3	0.55	0.65	0.15	0.2	0.2	0.25	0.65	0.75	0.1	0.15	0.15	0.2	0.55	0.65	0.15	0.2	0.2	0.25	0.25	0.35	0.3	0.35	0.35	0.4	0.45	0.55	0.2	0.25	0.25	0.3	0	0.05	0.45	0.5	0.5	0.55
	DM5	0.15	0.25	0.35	0.4	0.4	0.45	0.35	0.45	0.25	0.3	0.3	0.35	0.45	0.55	0.2	0.25	0.25	0.3	0.65	0.75	0.1	0.15	0.15	0.2	0.45	0.55	0.2	0.25	0.25	0.3	0.15	0.25	0.35	0.4	0.4	0.45	0.45	0.55	0.2	0.25	0.25	0.3	0	0.05	0.45	0.5	0.5	0.55
A7	Aggregated	0.0778852	0.172633	0.390666	0.440588	0.440725	0.490635	0.434631	0.534346	0.208049	0.258315	0.258191	0.308415	0.534582	0.634506	0.157828	0.208172	0.208049	0.258315	0.674747	0.776044	0.0864232	0.193692	0.137728	0.188318	0.534582	0.634506	0.157828	0.208172	0.208049	0.258315	0.235686	0.334698	0.30829	0.358489	0.358363	0.408545	0.504864	0.606089	0.172846	0.224662	0.224512	0.275602	0.116164	0.169976	0.169621	0.46405	0.463833	0.514553
A8	DM1	0.35	0.45	0.25	0.3	0.3	0.35	0.55	0.65	0.15	0.2	0.2	0.25	0.65	0.75	0.1	0.15	0.15	0.2	0.35	0.45	0.25	0.3	0.3	0.35	0.45	0.55	0.2	0.25	0.25	0.3	0.15	0.25	0.35	0.4	0.4	0.45	0.55	0.65	0.15	0.2	0.2	0.25	0.85	0.95	0	0.05	0.05	0.1
	DM2	0.45	0.55	0.2	0.25	0.25	0.3	0.25	0.35	0.3	0.35	0.35	0.4	0.65	0.75	0.1	0.15	0.15	0.2	0.75	0.85	0.05	0.1	0.1	0.15	0.25	0.35	0.3	0.35	0.35	0.4	0.15	0.25	0.35	0.4	0.4	0.45	0.55	0.65	0.15	0.2	0.2	0.25	0.85	0.95	0	0.05	0.05	0.1
	DM3	0.45	0.55	0.2	0.25	0.25	0.3	0.25	0.35	0.3	0.35	0.35	0.4	0.65	0.75	0.1	0.15	0.15	0.2	0.75	0.85	0.05	0.1	0.1	0.15	0.25	0.35	0.3	0.35	0.35	0.4	0.15	0.25	0.35	0.4	0.4	0.45	0.55	0.65	0.15	0.2	0.2	0.25	0.85	0.95	0	0.05	0.05	0.1
	DM4	0.35	0.45	0.25	0.3	0.3	0.35	0.25	0.35	0.3	0.35	0.35	0.4	0.65	0.75	0.1	0.15	0.15	0.2	0.75	0.85	0.05	0.1	0.1	0.15	0.25	0.35	0.3	0.35	0.35	0.4	0.15	0.25	0.35	0.4	0.4	0.45	0.55	0.65	0.15	0.2	0.2	0.25	0.85	0.95	0	0.05	0.05	0.1
	DM5	0.35	0.45	0.25	0.3	0.3	0.35	0.55	0.65	0.15	0.2	0.2	0.25	0.65	0.75	0.1	0.15	0.15	0.2	0.35	0.45	0.25	0.3	0.3	0.35	0.45	0.55	0.2	0.25	0.25	0.3	0.15	0.25	0.35	0.4	0.4	0.45	0.55	0.65	0.15	0.2	0.2	0.25	0.85	0.95	0	0.05	0.05	0.1
A8	Aggregated	0.39788	0.497329	0.226832	0.277284	0.277084	0.327458	0.404921	0.504171	0.229362	0.281584	0.281793	0.333217	0.65	0.75	0.1	0.15	0.15	0.2	0.653549	0.762716	0.0932627	0.190228	0.153041	0.208502	0.345585	0.444303	0.256398	0.307096	0.307232	0.357685	0.15	0.25	0.35	0.4	0.4	0.45	0.55	0.65	0.15	0.2	0.2	0.25	0.85	0.95	0	0.05	0.05	0.1
A9	DM1	0.75	0.85	0.05	0.1	0.1	0.15	0.25	0.35	0.3	0.35	0.35	0.4	0.45	0.55	0.2	0.25	0.25	0.3	0.35	0.45	0.25	0.3	0.3	0.35	0.85	0.95	0	0.05	0.05	0.1	0.15	0.25	0.35	0.4	0.4	0.45	0.65	0.75	0.1	0.15	0.15	0.2	0.15	0.25	0.35	0.4	0.4	0.45
	DM2	0.75	0.85	0.05	0.1	0.1	0.15	0.25	0.35	0.3	0.35	0.35	0.4	0.45	0.55	0.2	0.25	0.25	0.3	0.35	0.45	0.25	0.3	0.3	0.35	0.85	0.95	0	0.05	0.05	0.1	0.15	0.25	0.35	0.4	0.4	0.45	0.55	0.65	0.15	0.2	0.2	0.25	0.15	0.25	0.35	0.4	0.4	0.45
	DM3	0.75	0.85	0.05	0.1	0.1	0.15	0.25	0.35	0.3	0.35	0.35	0.4	0.45	0.55	0.2	0.25	0.25	0.3	0.35	0.45	0.25	0.3	0.3	0.35	0.85	0.95	0	0.05	0.05	0.1	0.15	0.25	0.35	0.4	0.4	0.45	0.55	0.65	0.15	0.2	0.2	0.25	0.15	0.25	0.35	0.4	0.4	0.45
	DM4	0.75	0.85	0.05	0.1	0.1	0.15	0.25	0.35	0.3	0.35	0.35	0.4	0.55	0.65	0.15	0.2	0.2	0.25	0.15	0.25	0.35	0.4	0.4	0.45	0.85	0.95	0	0.05	0.05	0.1	0.15	0.25	0.35	0.4	0.4	0.45	0.55	0.65	0.15	0.2	0.2	0.25	0.15	0.25	0.35	0.4	0.4	0.45
	DM5	0.45	0.55	0.2	0.25	0.25	0.3	0.25	0.35	0.3	0.35	0.35	0.4	0.85	0.95	0	0.05	0.05	0.1	0.75	0.85	0.05	0.1	0.1	0.15	0.25	0.35	0.3	0.35	0.35	0.4	0.15	0.25	0.35	0.4	0.4	0.45	0.55	0.65	0.15	0.2	0.2	0.25	0.15	0.25	0.35	0.4	0.4	0.45
A9	Aggregated	0.716586	0.820113	0.0638898	0.117873	0.117589	0.169869	0.25	0.35	0.3	0.35	0.35	0.4	0.594805	0.725488	0	0.179933	0.180803	0.238389	0.457347	0.566307	0.19961	0.392084	0.259923	0.314498	0.809843	0.924863	0	0.0708977	0.0705354	0.128247	0.15	0.25	0.35	0.4	0.4	0.45	0.574175	0.674601	0.137728	0.188318	0.188247	0.238598	0.15	0.25	0.335787	0.4	0.4	0.45
A10	DM1	0.25	0.35	0.3	0.35	0.35	0.4	0.15	0.25	0.35	0.4	0.4	0.45	0.25	0.35	0.3	0.35	0.35	0.4	0.85	0.95	0	0.05	0.05	0.1	0.45	0.55	0.2	0.25	0.25	0.3	0.85	0.95	0	0.05	0.05	0.1	0	0.05	0.45	0.5	0.5	0.55	0.15	0.25	0.35	0.4	0.4	0.45
	DM2	0.25	0.35	0.3	0.35	0.35	0.4	0.15	0.25	0.35	0.4	0.4	0.45	0.25	0.35	0.3	0.35	0.35	0.4	0.55	0.65	0.15	0.2	0.2	0.25	0.25	0.35	0.3	0.35	0.35	0.4	0.55	0.65	0.15	0.2	0.2	0.25	0.35	0.45	0.25	0.3	0.3	0.35	0.15	0.25	0.35	0.4	0.4	0.45
	DM3	0.25	0.35	0.3	0.35	0.35	0.4	0.15	0.25	0.35	0.4	0.4	0.45	0.25	0.35	0.3	0.35	0.35	0.4	0.55	0.65	0.15	0.2	0.2	0.25	0.25	0.35	0.3	0.35	0.35	0.4	0.55	0.65	0.15	0.2	0.2	0.25	0.35	0.45	0.25	0.3	0.3	0.35	0.15	0.25	0.35	0.4	0.4	0.45
	DM4	0.25	0.35	0.3	0.35	0.35	0.4	0.15	0.25	0.35	0.4	0.4	0.45	0.25	0.35	0.3	0.35	0.35	0.4	0.55	0.65	0.15	0.2	0.2	0.25	0.25	0.35	0.3	0.35	0.35	0.4	0.55	0.65	0.15	0.2	0.2	0.25	0.35	0.45	0.25	0.3	0.3	0.35	0.15	0.25	0.35	0.4	0.4	0.45
	DM5	0.45	0.55	0.2	0.25	0.25	0.3	0.25	0.35	0.3	0.35	0.35	0.4	0.85	0.95	0	0.05	0.05	0.1	0.75	0.85	0.05	0.1	0.1	0.15	0.25	0.35	0.3	0.35	0.35	0.4	0.15	0.25	0.35	0.4	0.4	0.45	0.55	0.65	0.15	0.2	0.2	0.25	0.15	0.25	0.35	0.4	0.4	0.45
A10	Aggregated	0.298215	0.397389	0.279244	0.329491	0.329783	0.379873	0.172323	0.271223	0.340588	0.390528	0.390666	0.440588	0.494036	0.639094	0	0.246835	0.248102	0.311899	0.686289	0.806851	0	0.199764	0.132148	0.188312	0.306401	0.404534	0.275456	0.326211	0.326067	0.376637	0.624647	0.752192	0	0.169474	0.168858	0.229352	0.365935	0.459688	0.258493	0.310406	0.310946	0.362167	0.15	0.25	0.294512	0.4	0.4	0.45
A11	DM1	0.75	0.85	0.05	0.1	0.1	0.15	0.25	0.35	0.3	0.35	0.35	0.4	0.55	0.65	0.15	0.2	0.2	0.25	0.15	0.25	0.35	0.4	0.4	0.45	0.85	0.95	0	0.05	0.05	0.1	0.15	0.25	0.35	0.4	0.4	0.45	0.55	0.65	0.15	0.2	0.2	0.25	0.15	0.25	0.35	0.4	0.4	0.45
	DM2	0.25	0.35	0.3	0.35	0.35	0.4	0.15	0.25	0.35	0.4	0.4	0.45	0.25	0.35	0.3	0.35	0.35	0.4	0.55	0.65	0.15	0.2	0.2	0.25	0.25	0.35	0.3	0.35	0.35	0.4	0.55	0.65	0.15	0.2	0.2	0.25	0.35	0.45	0.25	0.3	0.3	0.35	0.15	0.25	0.35	0.4	0.4	0.45
	DM3	0.25	0.35	0.3	0.35	0.35	0.4	0.15	0.25	0.35	0.4	0.4	0.45	0.25	0.35	0.3	0.35	0.35	0.4	0.55	0.65	0.15	0.2	0.2	0.25	0.25	0.35	0.3	0.35	0.35	0.4	0.55	0.65	0.15	0.2	0.2	0.25	0.35	0.45	0.25	0.3	0.3	0.35	0.15	0.25	0.35	0.4	0.4	0.45
	DM4	0.25	0.35	0.3	0.35	0.35	0.4	0.15	0.25	0.35	0.4	0.4	0.45	0.25	0.35	0.3	0.35	0.35	0.4	0.55	0.65	0.15	0.2	0.2	0.25	0.25	0.35	0.3	0.35	0.35	0.4	0.55	0.65	0.15	0.2	0.2	0.25	0.35	0.45	0.25	0.3	0.3	0.35	0.15	0.25	0.35	0.4	0.4	0.45
	DM5	0.55	0.65	0.15	0.2	0.2	0.25	0.55	0.65	0.15	0.2	0.2	0.25	0.55	0.65	0.15	0.2	0.2	0.25	0.55	0.65	0.15	0.2	0.2	0.25	0.25	0.35	0.3	0.35	0.35	0.4	0.55	0.65	0.15	0.2	0.2	0.25	0.35	0.45	0.25	0.3	0.3	0.35	0.55	0.65	0.15	0.2	0.2	0.25
A11	Aggregated	0.492085	0.600168	0.182004	0.243575	0.243534	0.299444	0.295285	0.390361	0.29168	0.343483	0.34405	0.395094	0.404921	0.504171	0.229362	0.281584	0.281793	0.333217	0.501141	0.600746	0.179289	0.308634	0.231419	0.282711	0.523871	0.667728	0	0.232956	0.232363	0.299302	0.501141	0.600746	0.179289	0.231209	0.231419	0.282711	0.404845	0.504552	0.224512	0.275602	0.275456	0.326211	0.2813	0.37493	0.329965	0.353213	0.353858	0.40495
A12	DM1	0.75	0.85	0.05	0.1	0.1	0.15	0.25	0.35	0.3	0.35	0.35	0.4	0.55	0.65	0.15	0.2	0.2	0.25	0.15	0.25	0.35	0.4	0.4	0.45	0.85	0.95	0	0.05	0.05	0.1	0.15	0.25	0.35	0.4	0.4	0.45	0.55	0.65	0.15	0.2	0.2	0.25	0.15	0.25	0.35	0.4	0.4	0.45
	DM2	0.05	0.15	0.4	0.45	0.45	0.5	0.45	0.55	0.2	0.25	0.25	0.3	0.55	0.65	0.15	0.2	0.2	0.25	0.65	0.75	0.1	0.15	0.15	0.2	0.55	0.65	0.15	0.2	0.2	0.25	0.25	0.35	0.3	0.35	0.35	0.4	0.45	0.55	0.2	0.25	0.25	0.3	0	0.05	0.45	0.5	0.5	0.55
	DM3	0.05	0.15	0.4	0.45	0.45	0.5	0.45	0.55	0.2	0.25	0.25	0.3	0.55	0.65	0.15	0.2	0.2	0.25	0.65	0.75	0.1	0.15	0.15	0.2	0.55	0.65	0.15	0.2	0.2	0.25	0.25	0.35	0.3	0.35	0.35	0.4	0.45	0.55	0.2	0.25	0.25	0.3	0	0.05	0.45	0.5	0.5	0.55
	DM4	0.05	0.15	0.4	0.45	0.45	0.5	0.45	0.55	0.2	0.25	0.25	0.3	0.55	0.65	0.15	0.2	0.2	0.25	0.65	0.75	0.1	0.15	0.15	0.2	0.55	0.65	0.15	0.2	0.2	0.25	0.25	0.35	0.3	0.35	0.35	0.4	0.45	0.55	0.2	0.25	0.25	0.3	0	0.05	0.45	0.5	0.5	0.55
	DM5	0.15	0.25	0.35	0.4	0.4	0.45	0.35	0.45	0.25	0.3	0.3	0.35	0.45	0.55	0.2	0.25	0.25	0.3	0.65	0.75	0.1	0.15	0.15	0.2	0.45	0.55	0.2	0.25	0.25	0.3	0.15	0.25	0.35	0.4	0.4	0.45	0.45	0.55	0.2	0.25	0.25	0.3	0	0.05	0.45	0.5	0.5	0.55
A12	Aggregated	0.405438	0.504461	0.252171	0.321648	0.321114	0.381392	0.401016	0.500375	0.226587	0.277153	0.277142	0.327546	0.534582	0.634506	0.157828	0.208172	0.208049	0.258315	0.595685	0.697765	0.130176	0.258859	0.1844	0.236977	0.641669	0.766965	0	0.155765	0.155391	0.213256	0.217266	0.315675	0.318458	0.368644	0.368579	0.418737	0.474003	0.574031	0.188247	0.238598	0.238528	0.288773	0.0691311	0.123942	0.202996	0.477196	0.477056	0.527389
A13	DM1	0.75	0.85	0.05	0.1	0.1	0.15	0.25	0.35	0.3	0.35	0.35	0.4	0.55	0.65	0.15	0.2	0.2	0.25	0.15	0.25	0.35	0.4	0.4	0.45	0.85	0.95	0	0.05	0.05	0.1	0.15	0.25	0.35	0.4	0.4	0.45	0.55	0.65	0.15	0.2	0.2	0.25	0.15	0.25	0.35	0.4	0.4	0.45
	DM2	0.45	0.55	0.2	0.25	0.25	0.3	0.25	0.35	0.3	0.35	0.35	0.4	0.65	0.75	0.1	0.15	0.15	0.2	0.75	0.85	0.05	0.1	0.1	0.15	0.25	0.35	0.3	0.35	0.35	0.4	0.15	0.25	0.35	0.4	0.4	0.45	0.55	0.65	0.15	0.2	0.2	0.25	0.85	0.95	0	0.05	0.05	0.1
	DM3	0.45	0.55	0.2	0.25	0.25	0.3	0.25	0.35	0.3	0.35	0.35	0.4	0.65	0.75	0.1	0.15	0.15	0.2	0.75	0.85	0.05	0.1	0.1	0.15	0.25	0.35	0.3	0.35	0.35	0.4	0.15	0.25	0.35	0.4	0.4	0.45	0.55	0.65	0.15	0.2	0.2	0.25	0.85	0.95	0	0.05	0.05	0.1
	DM4	0.35	0.45	0.25	0.3	0.3	0.35	0.25	0.35	0.3	0.35	0.35	0.4	0.65	0.75	0.1	0.15	0.15	0.2	0.75	0.85	0.05	0.1	0.1	0.15	0.25	0.35	0.3	0.35	0.35	0.4	0.15	0.25	0.35	0.4	0.4	0.45	0.55	0.65	0.15	0.2	0.2	0.25	0.85	0.95	0	0.05	0.05	0.1
	DM5	0.35	0.45	0.25	0.3	0.3	0.35	0.55	0.65	0.15	0.2	0.2	0.25	0.65	0.75	0.1	0.15	0.15	0.2	0.35	0.45	0.25	0.3	0.3	0.35	0.45	0.55	0.2	0.25	0.25	0.3	0.15	0.25	0.35	0.4	0.4	0.45	0.55	0.65	0.15	0.2	0.2	0.25	0.85	0.95	0	0.05	0.05	0.1
A13	Aggregated	0.522514	0.629669	0.161645	0.220349	0.219873	0.274268	0.332058	0.431243	0.265394	0.316557	0.317024	0.367645	0.631733	0.732351	0.10891	0.159305	0.159365	0.209558	0.6434	0.75322	0.100108	0.202028	0.162595	0.219757	0.543044	0.684271	0	0.219305	0.218941	0.284241	0.15	0.25	0.35	0.4	0.4	0.45	0.55	0.65	0.15	0.2	0.2	0.25	0.79892	0.918398	0	0.0772497	0.0774603	0.136978
A14	DM1	0.75	0.85	0.05	0.1	0.1	0.15	0.25	0.35	0.3	0.35	0.35	0.4	0.55	0.65	0.15	0.2	0.2	0.25	0.15	0.25	0.35	0.4	0.4	0.45	0.85	0.95	0	0.05	0.05	0.1	0.15	0.25	0.35	0.4	0.4	0.45	0.55	0.65	0.15	0.2	0.2	0.25	0.15	0.25	0.35	0.4	0.4	0.45
	DM2	0.75	0.85	0.05	0.1	0.1	0.15	0.25	0.35	0.3	0.35	0.35	0.4	0.45	0.55	0.2	0.25	0.25	0.3	0.35	0.45	0.25	0.3	0.3	0.35	0.85	0.95	0	0.05	0.05	0.1	0.15	0.25	0.35	0.4	0.4	0.45	0.55	0.65	0.15	0.2	0.2	0.25	0.15	0.25	0.35	0.4	0.4	0.45
	DM3	0.75	0.85	0.05	0.1	0.1	0.15	0.25	0.35	0.3	0.35	0.35	0.4	0.45	0.55	0.2	0.25	0.25	0.3	0.35	0.45	0.25	0.3	0.3	0.35	0.85	0.95	0	0.05	0.05	0.1	0.15	0.25	0.35	0.4	0.4	0.45	0.55	0.65	0.15	0.2	0.2	0.25	0.15	0.25	0.35	0.4	0.4	0.45
	DM4	0.75	0.85	0.05	0.1	0.1	0.15	0.25	0.35	0.3	0.35	0.35	0.4	0.55	0.65	0.15	0.2	0.2	0.25	0.15	0.25	0.35	0.4	0.4	0.45	0.85	0.95	0	0.05	0.05	0.1	0.15	0.25	0.35	0.4	0.4	0.45	0.55	0.65	0.15	0.2	0.2	0.25	0.15	0.25	0.35	0.4	0.4	0.45
	DM5	0.45	0.55	0.2	0.25	0.25	0.3	0.25	0.35	0.3	0.35	0.35	0.4	0.85	0.95	0	0.05	0.05	0.1	0.75	0.85	0.05	0.1	0.1	0.15	0.25	0.35	0.3	0.35	0.35	0.4	0.15	0.25	0.35	0.4	0.4	0.45	0.55	0.65	0.15	0.2	0.2	0.25	0.15	0.25	0.35	0.4	0.4	0.45
A14	Aggregated	0.716586	0.820113	0.0638898	0.117873	0.117589	0.169869	0.25	0.35	0.3	0.35	0.35	0.4	0.609725	0.738022	0	0.171726	0.172506	0.229468	0.437028	0.545277	0.214261	0.416405	0.276151	0.331475	0.809843	0.924863	0	0.0708977	0.0705354	0.128247	0.15	0.25	0.35	0.4	0.4	0.45	0.55	0.65	0.15	0.2	0.2	0.25	0.15	0.25	0.335787	0.4	0.4	0.45
A15	DM1	0.75	0.85	0.05	0.1	0.1	0.15	0.25	0.35	0.3	0.35	0.35	0.4	0.55	0.65	0.15	0.2	0.2	0.25	0.15	0.25	0.35	0.4	0.4	0.45	0.85	0.95	0	0.05	0.05	0.1	0.15	0.25	0.35	0.4	0.4	0.45	0.55	0.65	0.15	0.2	0.2	0.25	0.15	0.25	0.35	0.4	0.4	0.45
	DM2	0.25	0.35	0.3	0.35	0.35	0.4	0.15	0.25	0.35	0.4	0.4	0.45	0.25	0.35	0.3	0.35	0.35	0.4	0.55	0.65	0.15	0.2	0.2	0.25	0.25	0.35	0.3	0.35	0.35	0.4	0.55	0.65	0.15	0.2	0.2	0.25	0.35	0.45	0.25	0.3	0.3	0.35	0.15	0.25	0.35	0.4	0.4	0.45
	DM3	0.25	0.35	0.3	0.35	0.35	0.4	0.15	0.25	0.35	0.4	0.4	0.45	0.25	0.35	0.3	0.35	0.35	0.4	0.55	0.65	0.15	0.2	0.2	0.25	0.25	0.35	0.3	0.35	0.35	0.4	0.55	0.65	0.15	0.2	0.2	0.25	0.35	0.45	0.25	0.3	0.3	0.35	0.15	0.25	0.35	0.4	0.4	0.45
	DM4	0.25	0.35	0.3	0.35	0.35	0.4	0.15	0.25	0.35	0.4	0.4	0.45	0.25	0.35	0.3	0.35	0.35	0.4	0.55	0.65	0.15	0.2	0.2	0.25	0.25	0.35	0.3	0.35	0.35	0.4	0.55	0.65	0.15	0.2	0.2	0.25	0.35	0.45	0.25	0.3	0.3	0.35	0.15	0.25	0.35	0.4	0.4	0.45
	DM5	0.45	0.55	0.2	0.25	0.25	0.3	0.25	0.35	0.3	0.35	0.35	0.4	0.85	0.95	0	0.05	0.05	0.1	0.75	0.85	0.05	0.1	0.1	0.15	0.25	0.35	0.3	0.35	0.35	0.4	0.15	0.25	0.35	0.4	0.4	0.45	0.55	0.65	0.15	0.2	0.2	0.25	0.15	0.25	0.35	0.4	0.4	0.45
A15	Aggregated	0.473264	0.581509	0.191503	0.253527	0.253336	0.309404	0.195428	0.293755	0.329714	0.37977	0.379837	0.429864	0.538232	0.676768	0	0.219565	0.220531	0.282691	0.55716	0.663069	0.147634	0.308634	0.204724	0.257947	0.523871	0.667728	0	0.232956	0.232363	0.299302	0.45287	0.550307	0.208268	0.261836	0.261596	0.314163	0.444028	0.544541	0.205121	0.25626	0.256398	0.307096	0.15	0.25	0.300987	0.4	0.4	0.45
Aggregated
	C1						C2						C3						C4						C5						C6						C7						C8						C9
	MD (L)	MD (U)	AD (L)	AD (U)	NMD(L)	NMD(U)	MD (L)	MD (U)	AD (L)	AD (U)	NMD(L)	NMD(U)	MD (L)	MD (U)	AD (L)	AD (U)	NMD(L)	NMD(U)	MD (L)	MD (U)	AD (L)	AD (U)	NMD(L)	NMD(U)	MD (L)	MD (U)	AD (L)	AD (U)	NMD(L)	NMD(U)	MD (L)	MD (U)	AD (L)	AD (U)	NMD(L)	NMD(U)	MD (L)	MD (U)	AD (L)	AD (U)	NMD(L)	NMD(U)	MD (L)	MD (U)	AD (L)	AD (U)	NMD(L)	NMD(U)	MD (L)
A1	0.660855	0.769202	0.0896544	0.14833	0.148186	0.202813	0.345081	0.44276	0.25927	0.311332	0.311104	0.362542	0.629478	0.755227	0	0.161696	0.16237	0.219002	0.457347	0.566307	0.19961	0.392084	0.259923	0.314498	0.755116	0.884147	0	0.0992788	0.09898	0.161384	0.15	0.25	0.35	0.4	0.4	0.45	0.55	0.65	0.15	0.2	0.2	0.25	0.500108	0.645062	0	0.258901	0.258197	0.328519	0.460491
A2	0.298215	0.397389	0.279244	0.329491	0.329783	0.379873	0.172323	0.271223	0.340588	0.390528	0.390666	0.440588	0.494036	0.639094	0	0.246835	0.248102	0.311899	0.686289	0.806851	0	0.199764	0.132148	0.188312	0.306401	0.404534	0.275456	0.326211	0.326067	0.376637	0.624647	0.752192	0	0.169474	0.168858	0.229352	0.365935	0.459688	0.258493	0.310406	0.310946	0.362167	0.15	0.25	0.354215	0.4	0.4	0.45	0.786398
A3	0.202976	0.282749	0.353858	0.40495	0.405577	0.456202	0.423512	0.52265	0.214866	0.265561	0.265326	0.315895	0.638277	0.761793	0	0.155949	0.15652	0.212093	0.693816	0.795895	0.0764539	0.193692	0.128199	0.178843	0.514837	0.614387	0.169559	0.221129	0.220804	0.272002	0.235686	0.334698	0.30829	0.358489	0.358363	0.408545	0.521855	0.623234	0.164273	0.215843	0.215825	0.266731	0.132121	0.199106	0.16854	0.445834	0.445887	0.496352	0.351301
A4	0.418422	0.517821	0.216423	0.266907	0.266651	0.317066	0.332058	0.431243	0.265394	0.316557	0.317024	0.367645	0.710679	0.824873	0	0.1192	0.119029	0.173003	0.710776	0.815241	0.0664611	0.151168	0.121442	0.174634	0.298215	0.397389	0.279244	0.329491	0.329783	0.379873	0.15	0.25	0.35	0.4	0.4	0.45	0.55	0.65	0.15	0.2	0.2	0.25	0.79892	0.918398	0	0.0772497	0.0774603	0.136978	0.232847
A5	0.716586	0.820113	0.0638898	0.117873	0.117589	0.169869	0.298215	0.397389	0.279244	0.329491	0.329783	0.379873	0.489292	0.590083	0.180653	0.230758	0.231029	0.280997	0.297256	0.393491	0.281591	0.392084	0.332129	0.383038	0.820597	0.930501	0	0.0641234	0.0638898	0.117873	0.13623	0.228045	0.365905	0.416343	0.416099	0.466501	0.574175	0.674601	0.137728	0.188318	0.188247	0.238598	0.137815	0.235466	0.301549	0.408545	0.408418	0.45859	0.506578
A6	0.332058	0.431243	0.265394	0.316557	0.317024	0.367645	0.2813	0.37493	0.3013	0.353213	0.353858	0.40495	0.332058	0.431243	0.265394	0.316557	0.317024	0.367645	0.652313	0.775856	0	0.199764	0.149379	0.206391	0.306401	0.404534	0.275456	0.326211	0.326067	0.376637	0.652313	0.775856	0	0.149651	0.149379	0.206391	0.313091	0.405314	0.282929	0.333835	0.334059	0.384709	0.2813	0.37493	0.314398	0.353213	0.353858	0.40495	0.83342
A7	0.0778852	0.172633	0.390666	0.440588	0.440725	0.490635	0.434631	0.534346	0.208049	0.258315	0.258191	0.308415	0.534582	0.634506	0.157828	0.208172	0.208049	0.258315	0.674747	0.776044	0.0864232	0.193692	0.137728	0.188318	0.534582	0.634506	0.157828	0.208172	0.208049	0.258315	0.235686	0.334698	0.30829	0.358489	0.358363	0.408545	0.504864	0.606089	0.172846	0.224662	0.224512	0.275602	0.116164	0.169976	0.169621	0.46405	0.463833	0.514553	0.374142
A8	0.39788	0.497329	0.226832	0.277284	0.277084	0.327458	0.404921	0.504171	0.229362	0.281584	0.281793	0.333217	0.65	0.75	0.1	0.15	0.15	0.2	0.653549	0.762716	0.0932627	0.190228	0.153041	0.208502	0.345585	0.444303	0.256398	0.307096	0.307232	0.357685	0.15	0.25	0.35	0.4	0.4	0.45	0.55	0.65	0.15	0.2	0.2	0.25	0.85	0.95	0	0.05	0.05	0.1	0.25
A9	0.716586	0.820113	0.0638898	0.117873	0.117589	0.169869	0.25	0.35	0.3	0.35	0.35	0.4	0.594805	0.725488	0	0.179933	0.180803	0.238389	0.457347	0.566307	0.19961	0.392084	0.259923	0.314498	0.809843	0.924863	0	0.0708977	0.0705354	0.128247	0.15	0.25	0.35	0.4	0.4	0.45	0.574175	0.674601	0.137728	0.188318	0.188247	0.238598	0.15	0.25	0.335787	0.4	0.4	0.45	0.509516
A10	0.298215	0.397389	0.279244	0.329491	0.329783	0.379873	0.172323	0.271223	0.340588	0.390528	0.390666	0.440588	0.494036	0.639094	0	0.246835	0.248102	0.311899	0.686289	0.806851	0	0.199764	0.132148	0.188312	0.306401	0.404534	0.275456	0.326211	0.326067	0.376637	0.624647	0.752192	0	0.169474	0.168858	0.229352	0.365935	0.459688	0.258493	0.310406	0.310946	0.362167	0.15	0.25	0.294512	0.4	0.4	0.45	0.786398
A11	0.492085	0.600168	0.182004	0.243575	0.243534	0.299444	0.295285	0.390361	0.29168	0.343483	0.34405	0.395094	0.404921	0.504171	0.229362	0.281584	0.281793	0.333217	0.501141	0.600746	0.179289	0.308634	0.231419	0.282711	0.523871	0.667728	0	0.232956	0.232363	0.299302	0.501141	0.600746	0.179289	0.231209	0.231419	0.282711	0.404845	0.504552	0.224512	0.275602	0.275456	0.326211	0.2813	0.37493	0.329965	0.353213	0.353858	0.40495	0.814298
A12	0.405438	0.504461	0.252171	0.321648	0.321114	0.381392	0.401016	0.500375	0.226587	0.277153	0.277142	0.327546	0.534582	0.634506	0.157828	0.208172	0.208049	0.258315	0.595685	0.697765	0.130176	0.258859	0.1844	0.236977	0.641669	0.766965	0	0.155765	0.155391	0.213256	0.217266	0.315675	0.318458	0.368644	0.368579	0.418737	0.474003	0.574031	0.188247	0.238598	0.238528	0.288773	0.0691311	0.123942	0.202996	0.477196	0.477056	0.527389	0.404845
A13	0.522514	0.629669	0.161645	0.220349	0.219873	0.274268	0.332058	0.431243	0.265394	0.316557	0.317024	0.367645	0.631733	0.732351	0.10891	0.159305	0.159365	0.209558	0.6434	0.75322	0.100108	0.202028	0.162595	0.219757	0.543044	0.684271	0	0.219305	0.218941	0.284241	0.15	0.25	0.35	0.4	0.4	0.45	0.55	0.65	0.15	0.2	0.2	0.25	0.79892	0.918398	0	0.0772497	0.0774603	0.136978	0.345081
A14	0.716586	0.820113	0.0638898	0.117873	0.117589	0.169869	0.25	0.35	0.3	0.35	0.35	0.4	0.609725	0.738022	0	0.171726	0.172506	0.229468	0.437028	0.545277	0.214261	0.416405	0.276151	0.331475	0.809843	0.924863	0	0.0708977	0.0705354	0.128247	0.15	0.25	0.35	0.4	0.4	0.45	0.55	0.65	0.15	0.2	0.2	0.25	0.15	0.25	0.335787	0.4	0.4	0.45	0.509516
A15	0.473264	0.581509	0.191503	0.253527	0.253336	0.309404	0.195428	0.293755	0.329714	0.37977	0.379837	0.429864	0.538232	0.676768	0	0.219565	0.220531	0.282691	0.55716	0.663069	0.147634	0.308634	0.204724	0.257947	0.523871	0.667728	0	0.232956	0.232363	0.299302	0.45287	0.550307	0.208268	0.261836	0.261596	0.314163	0.444028	0.544541	0.205121	0.25626	0.256398	0.307096	0.15	0.25	0.300987	0.4	0.4	0.45	0.760957
IVSF DM Alternatives
	C1					C2					C3					C4					C5					C6					C7					C8					C9					C10
	D+L	D+U	D-L	D-U	CW	D+L	D+U	D-L	D-U	CW	D+L	D+U	D-L	D-U	CW	D+L	D+U	D-L	D-U	CW	D+L	D+U	D-L	D-U	CW	D+L	D+U	D-L	D-U	CW	D+L	D+U	D-L	D-U	CW	D+L	D+U	D-L	D-U	CW	D+L	D+U	D-L	D-U	CW	D+L	D+U	D-L	D-U
A1	0.38081	0.341178	1.08183	1.11767	0.75287	0.770017	0.734085	0.812944	0.836252	0.523007	0.404537	0.366089	1.04779	1.09839	0.735798	0.633937	0.663874	0.892594	0.971775	0.589583	0.264131	0.222088	1.1756	1.22264	0.831435	1.0025	0.961769	0.710634	0.724569	0.422184	0.514782	0.474342	0.982344	1.01242	0.668512	0.562634	0.548576	0.89464	0.966448	0.626144	0.629612	0.594404	0.89928	0.926375	0.59864	0.589807	0.553745	0.92273	0.955288
A2	0.824158	0.784862	0.78492	0.806871	0.497309	0.97656	0.936881	0.719016	0.734177	0.431646	0.56352	0.537086	0.899679	0.971006	0.629587	0.340408	0.335669	1.10642	1.16179	0.770376	0.814417	0.776433	0.789901	0.811568	0.501663	0.411586	0.377799	1.0397	1.09014	0.729591	0.752027	0.720731	0.821902	0.845279	0.53096	1.00398	0.961769	0.712719	0.724569	0.422355	0.229367	0.191119	1.20759	1.24902	0.853851	1.09415	1.05801	0.68664	0.69525
A3	0.961746	0.941569	0.72094	0.734608	0.433345	0.670002	0.631011	0.874801	0.900936	0.577147	0.394134	0.35503	1.05776	1.107	0.742902	0.34063	0.333407	1.11681	1.15986	0.771567	0.559364	0.521134	0.949186	0.977932	0.640746	0.898689	0.859099	0.749859	0.768346	0.463434	0.549717	0.509594	0.956164	0.986252	0.647099	0.990169	1.04238	0.594056	0.701479	0.389273	0.759719	0.722235	0.819898	0.84309	0.528782	0.82963	0.793276	0.781687	0.802443
A4	0.675407	0.63582	0.871617	0.897651	0.574346	0.785547	0.747566	0.804458	0.828283	0.515735	0.312849	0.273511	1.13189	1.17412	0.797273	0.320649	0.295778	1.13203	1.16991	0.788777	0.824158	0.784862	0.78492	0.806871	0.497309	1.0025	0.961769	0.710634	0.724569	0.422184	0.514782	0.474342	0.982344	1.01242	0.668512	0.215484	0.177171	1.22039	1.26263	0.863456	0.902298	0.862406	0.748252	0.766771	0.461936	0.689664	0.651813	0.861623	0.887465
A5	0.313421	0.27406	1.13852	1.17286	0.797341	0.824158	0.784862	0.78492	0.806871	0.497309	0.588925	0.547942	0.92917	0.958339	0.624099	0.826712	0.817497	0.783394	0.830185	0.495299	0.19044	0.151116	1.24486	1.28378	0.880999	1.02622	0.993418	0.702414	0.71412	0.412242	0.485523	0.445284	1.00379	1.03454	0.686506	1.00055	0.980676	0.678155	0.717968	0.413378	0.576157	0.544554	0.935285	0.962033	0.628661	0.470955	0.432853	1.00964	1.04516
A6	0.785547	0.747566	0.804458	0.828283	0.515735	0.855878	0.824291	0.766427	0.78703	0.480407	0.785547	0.747566	0.804458	0.828283	0.515735	0.378419	0.36434	1.07195	1.12768	0.747566	0.814417	0.776433	0.789901	0.811568	0.501663	0.378419	0.33946	1.07195	1.11989	0.753282	0.814548	0.783006	0.788386	0.808893	0.499957	0.860577	0.824291	0.77167	0.78703	0.480551	0.17634	0.138251	1.25787	1.29466	0.890276	0.90785	0.889816	0.740939	0.757538
A7	1.09415	1.05801	0.68664	0.69525	0.391023	0.65543	0.61537	0.884573	0.911341	0.585615	0.533674	0.493607	0.968439	0.998013	0.656856	0.363631	0.350908	1.0983	1.13956	0.75798	0.533674	0.493607	0.968439	0.998013	0.656856	0.898689	0.859099	0.749859	0.768346	0.463434	0.570474	0.530655	0.941353	0.97086	0.634582	1.01246	1.08122	0.57423	0.692743	0.377001	0.729345	0.689248	0.838343	0.863131	0.545333	0.82963	0.793276	0.781687	0.802443
A8	0.700554	0.660903	0.855785	0.881212	0.560601	0.697233	0.660431	0.855797	0.882087	0.561414	0.3937	0.353553	1.07471	1.1068	0.744857	0.390061	0.368732	1.07386	1.11552	0.742622	0.767066	0.728729	0.815534	0.839214	0.525226	1.0025	0.961769	0.710634	0.724569	0.422184	0.514782	0.474342	0.982344	1.01242	0.668512	0.158114	0.122474	1.27475	1.30958	0.902061	0.880341	0.839643	0.758288	0.777817	0.471764	0.636396	0.595819	0.897218	0.924662
A9	0.313421	0.27406	1.13852	1.17286	0.797341	0.880341	0.839643	0.758288	0.777817	0.471764	0.443703	0.405663	1.01236	1.06713	0.710001	0.633937	0.663874	0.892594	0.971775	0.589583	0.202818	0.164679	1.23278	1.27293	0.872095	1.0025	0.961769	0.710634	0.724569	0.422184	0.485523	0.445284	1.00379	1.03454	0.686506	0.997623	0.961769	0.703742	0.724569	0.421616	0.567492	0.530944	0.942826	0.971026	0.635348	0.486524	0.451286	0.996448	1.0316
A10	0.824158	0.784862	0.78492	0.806871	0.497309	0.97656	0.936881	0.719016	0.734177	0.431646	0.56352	0.537086	0.899679	0.971006	0.629587	0.340408	0.335669	1.10642	1.16179	0.770376	0.814417	0.776433	0.789901	0.811568	0.501663	0.411586	0.377799	1.0397	1.09014	0.729591	0.752027	0.720731	0.821902	0.845279	0.53096	0.984499	0.961769	0.685009	0.724569	0.420037	0.229367	0.191119	1.20759	1.24902	0.853851	1.09415	1.05801	0.68664	0.69525
A11	0.591956	0.555753	0.920605	0.954101	0.620268	0.836702	0.803579	0.776235	0.797668	0.489674	0.697233	0.660431	0.855797	0.882087	0.561414	0.578411	0.578432	0.934881	0.985218	0.624028	0.529803	0.504237	0.929359	0.995543	0.650537	0.578411	0.541098	0.934881	0.963772	0.629076	0.693175	0.654094	0.859807	0.885732	0.564387	0.866385	0.824291	0.778142	0.78703	0.480726	0.1974	0.156616	1.23842	1.27884	0.876704	0.845161	0.821444	0.770423	0.7898
A12	0.721255	0.70319	0.829974	0.860589	0.542716	0.697805	0.658579	0.857134	0.882826	0.56194	0.533674	0.493607	0.968439	0.998013	0.656856	0.463055	0.463154	1.01833	1.06587	0.692331	0.390573	0.352202	1.06071	1.10971	0.745031	0.921921	0.882916	0.739806	0.757242	0.453392	0.607459	0.567246	0.916491	0.944608	0.61305	1.06551	1.12842	0.565205	0.682963	0.362619	0.693175	0.654094	0.859807	0.885732	0.564387	0.867827	0.829409	0.763636	0.783167
A13	0.54997	0.510805	0.952758	0.985761	0.646325	0.785547	0.747566	0.804458	0.828283	0.515735	0.415788	0.375405	1.05717	1.08927	0.730671	0.404503	0.38731	1.06077	1.10315	0.732109	0.506699	0.478093	0.951289	1.01421	0.666206	1.0025	0.961769	0.710634	0.724569	0.422184	0.514782	0.474342	0.982344	1.01242	0.668512	0.215484	0.177171	1.22039	1.26263	0.863456	0.770017	0.734085	0.812944	0.836252	0.523007	0.65916	0.618694	0.882129	0.909098
A14	0.313421	0.27406	1.13852	1.17286	0.797341	0.880341	0.839643	0.758288	0.777817	0.471764	0.426701	0.388302	1.02787	1.08069	0.721229	0.662649	0.70003	0.872273	0.957938	0.573214	0.202818	0.164679	1.23278	1.27293	0.872095	1.0025	0.961769	0.710634	0.724569	0.422184	0.514782	0.474342	0.982344	1.01242	0.668512	0.997623	0.961769	0.703742	0.724569	0.421616	0.567492	0.530944	0.942826	0.971026	0.635348	0.60997	0.574163	0.908305	0.940967
A15	0.615063	0.578914	0.904522	0.937738	0.606758	0.948854	0.90983	0.729044	0.745367	0.442355	0.511726	0.482288	0.947242	1.01032	0.663227	0.50972	0.524703	0.982185	1.0419	0.661788	0.529803	0.504237	0.929359	0.995543	0.650537	0.641217	0.607848	0.890903	0.91748	0.591468	0.645693	0.606152	0.890045	0.917775	0.590856	0.986455	0.961769	0.687818	0.724569	0.420277	0.25786	0.217366	1.18111	1.22676	0.835168	0.980205	0.95465	0.715658	0.728495
Extended IVSF DM			C1 to C7 (Benefit)					C8 to C10 (Cost)				Normalized IVSF DM													Weighted IVSF DM
	C1	C2	C3	C4	C5	C6	C7	C8	C9	C10			C1	C2	C3	C4	C5	C6	C7	C8	C9	C10	0.109648			C1	C2	C3	C4	C5	C6	C7	C8	C9	C10
A1	0.75287	0.523007	0.735798	0.589583	0.831435	0.422184	0.668512	0.626144	0.59864	0.621537		A1	0.944226	0.89309	0.922894	0.747466	0.943741	0.56046	0.973789	1.02692	0.579129	0.771642	0.109648		A1	0.103532	0.0979254	0.100287	0.0712519	0.0899617	0.057739	0.0910393	0.0960062	0.0572345	0.0714236
A2	0.497309	0.431646	0.629587	0.770376	0.501663	0.729591	0.53096	0.422355	0.853851	0.391023		A2	0.623709	0.737081	0.789675	0.976673	0.569425	0.968549	0.773423	1.29295	0.858564	0.541003	0.108666		A2	0.0683884	0.0808194	0.0858106	0.0931009	0.0542802	0.0997807	0.0723071	0.120878	0.0848506	0.0500755
A3	0.433345	0.577147	0.742902	0.771567	0.640746	0.463434	0.647099	0.389273	0.528782	0.493955		A3	0.543488	0.985539	0.931804	0.978182	0.727295	0.615219	0.942598	1.0609	0.931528	0.873585	0.0953246		A3	0.0595923	0.108062	0.101255	0.0932448	0.0693291	0.0633803	0.0881233	0.099183	0.0920616	0.0808595
A4	0.574346	0.515735	0.797273	0.788777	0.497309	0.422184	0.668512	0.863456	0.461936	0.565944		A4	0.720326	0.880672	1	1	0.564482	0.56046	0.973789	1.02692	0.419962	1	0.0953246		A4	0.0789822	0.0965638	0.108666	0.0953246	0.0538091	0.057739	0.0910393	0.0960062	0.0415042	0.0925606
A5	0.797341	0.497309	0.624099	0.495299	0.880999	0.412242	0.686506	0.413378	0.628661	0.694516		A5	1	0.849207	0.782792	0.627933	1	0.547261	1	1	0.877208	0.734793	0.103021		A5	0.109648	0.0931138	0.0850626	0.0598575	0.0953246	0.0563792	0.0934898	0.0934898	0.0866932	0.0680128
A6	0.515735	0.480407	0.515735	0.747566	0.501663	0.753282	0.499957	0.480551	0.890276	0.454615		A6	0.646819	0.820346	0.646873	0.947754	0.569425	1	0.728263	1.37313	0.754589	0.518868	0.0934898		A6	0.0709223	0.0899492	0.070293	0.0903443	0.0542802	0.103021	0.0680851	0.128374	0.0745749	0.0480267
A7	0.391023	0.585615	0.656856	0.75798	0.656856	0.463434	0.634582	0.377001	0.545333	0.493955		A7	0.490408	1	0.823878	0.960956	0.745581	0.615219	0.924365	1.08182	0.96185	0.847072	0.0934898		A7	0.0537722	0.109648	0.0895274	0.0916028	0.0710722	0.0633803	0.0864186	0.101139	0.0950582	0.0784054
A8	0.560601	0.561414	0.744857	0.742622	0.525226	0.422184	0.668512	0.902061	0.471764	0.596537		A8	0.703089	0.958674	0.934255	0.941486	0.596171	0.56046	0.973789	1.02692	0.401989	0.979167	0.0988285		A8	0.0770922	0.105117	0.101522	0.0897468	0.0568298	0.057739	0.0910393	0.0960062	0.039728	0.0906323
A9	0.797341	0.471764	0.710001	0.589583	0.872095	0.422184	0.686506	0.421616	0.635348	0.683798		A9	1	0.805587	0.890536	0.747466	0.989893	0.56046	1	1	0.860068	0.727059	0.0925606		A9	0.109648	0.0883309	0.0967708	0.0712519	0.0943612	0.057739	0.0934898	0.0934898	0.0849993	0.067297
A10	0.497309	0.431646	0.629587	0.770376	0.501663	0.729591	0.53096	0.420037	0.853851	0.391023		A10	0.623709	0.737081	0.789675	0.976673	0.569425	0.968549	0.773423	1.29295	0.863303	0.541003			A10	0.0683884	0.0808194	0.0858106	0.0931009	0.0542802	0.0997807	0.0723071	0.120878	0.0853189	0.0500755
A11	0.620268	0.489674	0.561414	0.624028	0.650537	0.629076	0.564387	0.480726	0.876704	0.483516		A11	0.77792	0.836171	0.704168	0.791134	0.738408	0.835113	0.822114	1.21638	0.754314	0.5269			A11	0.0852973	0.0916843	0.0765189	0.0754145	0.0703885	0.086034	0.0768593	0.113719	0.0745477	0.0487702
A12	0.542716	0.56194	0.656856	0.692331	0.745031	0.453392	0.61305	0.362619	0.564387	0.476814		A12	0.680657	0.959573	0.823878	0.877728	0.845666	0.601888	0.893	1.11982	1	0.818474			A12	0.0746326	0.105215	0.0895274	0.083669	0.0806127	0.062007	0.0834863	0.104692	0.0988285	0.0757584
A13	0.646325	0.515735	0.730671	0.732109	0.666206	0.422184	0.668512	0.863456	0.523007	0.583636		A13	0.810601	0.880672	0.916462	0.928158	0.756193	0.56046	0.973789	1.02692	0.419962	0.883231			A13	0.0888807	0.0965638	0.099588	0.0884763	0.0720838	0.057739	0.0910393	0.0960062	0.0415042	0.0817523
A14	0.797341	0.471764	0.721229	0.573214	0.872095	0.422184	0.668512	0.421616	0.635348	0.609636		A14	1	0.805587	0.90462	0.726713	0.989893	0.56046	0.973789	1.02692	0.860068	0.727059			A14	0.109648	0.0883309	0.0983012	0.0692736	0.0943612	0.057739	0.0910393	0.0960062	0.0849993	0.067297
A15	0.606758	0.442355	0.663227	0.661788	0.650537	0.591468	0.590856	0.420277	0.835168	0.42739		A15	0.760976	0.755368	0.831869	0.839006	0.738408	0.785188	0.860671	1.16188	0.862809	0.553105			A15	0.0834394	0.0828245	0.0903956	0.0799779	0.0703885	0.0808906	0.0804639	0.108624	0.0852702	0.0511957
I	0.797341	0.585615	0.797273	0.788777	0.880999	0.753282	0.686506	0.362619	0.461936	0.391023		I	1	1	1	1	1	1	1	1	1	1			I	0.109648	0.109648	0.108666	0.0953246	0.0953246	0.103021	0.0934898	0.0934898	0.0988285	0.0925606	SUM	1
AI	0.391023	0.431646	0.515735	0.495299	0.497309	0.412242	0.499957	0.902061	0.890276	0.694516		AI	0.490408	0.737081	0.646873	0.627933	0.564482	0.547261	0.728263	1.37313	0.401989	0.518868			AI	0.0537722	0.0808194	0.070293	0.0598575	0.0538091	0.0563792	0.0680851	0.128374	0.039728	0.0480267		0.659144
Final
	Si	Ki-	Ki+	f(Ki-)	f(Ki+)	f(Ki)	Rank										A1	7
A1	0.836401	1.26892	0.836401	0.397279	0.602721	0.662829	7										A2	12
A2	0.810291	1.22931	0.810291	0.397279	0.602721	0.642138	12										A3	4
A3	0.855091	1.29728	0.855091	0.397279	0.602721	0.677641	4										A4	10
A4	0.812195	1.2322	0.812195	0.397279	0.602721	0.643647	10										A5	5
A5	0.841071	1.27601	0.841071	0.397279	0.602721	0.666531	5										A6	15
A6	0.79787	1.21046	0.79787	0.397279	0.602721	0.632295	15										A7	6
A7	0.840024	1.27442	0.840024	0.397279	0.602721	0.665701	6										A8	13
A8	0.805452	1.22197	0.805452	0.397279	0.602721	0.638303	13										A9	2
A9	0.857377	1.30074	0.857377	0.397279	0.602721	0.679453	2										A10	11
A10	0.81076	1.23002	0.81076	0.397279	0.602721	0.642509	11										A11	14
A11	0.799233	1.21253	0.799233	0.397279	0.602721	0.633375	14										A12	1
A12	0.858429	1.30234	0.858429	0.397279	0.602721	0.680286	1										A13	8
A13	0.813634	1.23438	0.813634	0.397279	0.602721	0.644787	8										A14	3
A14	0.856995	1.30016	0.856995	0.397279	0.602721	0.67915	3										A15	9
A15	0.813471	1.23413	0.813471	0.397279	0.602721	0.644658	9
[truncated: 25 more columns]

## Sheet: Sensitivity IVSFS
	DM1								DM2								DM3								DM4								DM5										weights
	MD (L)	MD (U)	AD (L)	AD (U)	NMD(L)	NMD(U)	HD(L)	SUM (U)	MD (L)	MD (U)	AD (L)	AD (U)	NMD(L)	NMD(U)	HD(L)	HD(U)	MD (L)	MD (U)	AD (L)	AD (U)	NMD(L)	NMD(U)	HD(L)	HD(U)	MD (L)	MD (U)	AD (L)	AD (U)	NMD(L)	NMD(U)	HD(L)	HD(U)	MD (L)	MD (U)	AD (L)	AD (U)	NMD(L)	NMD(U)	HD(L)	HD(U)			I,I,VUI,M,M		DM1
C1	0.6	0.7	0.2	0.25	0.25	0.3		0.6425	0.75	0.85	0.15	0.2	0.1	0.15		0.785	0.85	0.95	0.1	0.15	0.05	0.1		0.935	0.6	0.7	0.2	0.25	0.25	0.3		0.6425	0.85	0.95	0.1	0.15	0.05	0.1		0.935					MD (L)	MD (U)	AD (L)	AD (U)	NMD(L)
C2	0.6	0.7	0.2	0.25	0.25	0.3		0.6425	0.75	0.85	0.15	0.2	0.1	0.15		0.785	0.85	0.95	0.1	0.15	0.05	0.1		0.935	0.6	0.7	0.2	0.25	0.25	0.3		0.6425	0.85	0.95	0.1	0.15	0.05	0.1		0.935					0.75	0.85	0.15	0.2	0.1
C3	0.75	0.85	0.15	0.2	0.1	0.15		0.785	0.75	0.85	0.15	0.2	0.1	0.15		0.785	0.6	0.7	0.2	0.25	0.25	0.3		0.6425	0.75	0.85	0.15	0.2	0.1	0.15		0.785	0.85	0.95	0.1	0.15	0.05	0.1		0.935			O(e)	L	0.268062	0.268062	0.119352	0.225172	0.119352
C4	0.75	0.85	0.15	0.2	0.1	0.15		0.785	0.25	0.35	0.4	0.45	0.45	0.5		0.575	0.6	0.7	0.2	0.25	0.25	0.3		0.6425	0.75	0.85	0.15	0.2	0.1	0.15		0.785	0.6	0.7	0.2	0.25	0.25	0.3		0.6425				U	0.255922	0.255922	0.134307	0.219541	0.134307
C5	0.75	0.85	0.15	0.2	0.1	0.15		0.785	0.25	0.35	0.4	0.45	0.45	0.5		0.575	0.6	0.7	0.2	0.25	0.25	0.3		0.6425	0.75	0.85	0.15	0.2	0.1	0.15		0.785	0.6	0.7	0.2	0.25	0.25	0.3		0.6425								RESULTS
C6	0.4	0.5	0.3	0.35	0.35	0.4		0.5325	0.85	0.95	0.1	0.15	0.05	0.1		0.935	0.85	0.95	0.1	0.15	0.05	0.1		0.935	0.25	0.35	0.4	0.45	0.45	0.5		0.575	0.6	0.7	0.2	0.25	0.25	0.3		0.6425				C1	0.106471	A1	0.656027		C1
C7	0.4	0.5	0.3	0.35	0.35	0.4		0.5325	0.85	0.95	0.1	0.15	0.05	0.1		0.935	0.25	0.35	0.4	0.45	0.45	0.5		0.575	0.25	0.35	0.4	0.45	0.45	0.5		0.575	0.75	0.85	0.15	0.2	0.1	0.15		0.785				C2	0.106471	A2	0.63965		C2
C8	0.4	0.5	0.3	0.35	0.35	0.4		0.5325	0.85	0.95	0.1	0.15	0.05	0.1		0.935	0.25	0.35	0.4	0.45	0.45	0.5		0.575	0.25	0.35	0.4	0.45	0.45	0.5		0.575	0.75	0.85	0.15	0.2	0.1	0.15		0.785				C3	0.109444	A3	0.673385		C3
C9	0.6	0.7	0.2	0.25	0.25	0.3		0.6425	0.6	0.7	0.2	0.25	0.25	0.3		0.6425	0.6	0.7	0.2	0.25	0.25	0.3		0.6425	0.75	0.85	0.15	0.2	0.1	0.15		0.785	0.75	0.85	0.15	0.2	0.1	0.15		0.785				C4	0.0965361	A4	0.642531		C4
C10	0.6	0.7	0.2	0.25	0.25	0.3		0.6425	0.6	0.7	0.2	0.25	0.25	0.3		0.6425	0.6	0.7	0.2	0.25	0.25	0.3		0.6425	0.75	0.85	0.15	0.2	0.1	0.15		0.785	0.4	0.5	0.3	0.35	0.35	0.4		0.5325				C5	0.0965361	A5	0.663808		C5
																																												C6	0.100371	A6	0.631726		C6
aggregated																						D1	D2	D3	D4	D5																		C7	0.0953438	A7	0.664442		C7
IVSFWA									Weights of the criteria				pi+ (1,0,0)	pi- (0,1,0)							C1	M	I	VI	M	VI																		C8	0.0953438	A8	0.63602		C8
	MD(L)	MD(U)	AD(L)	AD(U)	NMD(L)	NMD(U)				D+L	D+U	D-L	D-U	CW	weights						C2	M	I	VI	M	VI																		C9	0.0989261	A9	0.67374		C9
C1	0.725644	0.848622	0.156921	0.205848	0.133174	0.187033			C1	0.342974	0.316655	1.1413	1.19308	0.779684	0.106471						C3	I	I	M	I	VI																		C10	0.0945578	A10	0.639986		C10

C2	0.725644	0.848622	0.156921	0.205848	0.133174	0.187033			C2	0.342974	0.316655	1.1413	1.19308	0.779684	0.106471						C4	I	VU	M	I	M																				A11	0.632856		A1
C3	0.75259	0.859262	0.147906	0.198274	0.102699	0.155909			C3	0.305998	0.288838	1.18043	1.22071	0.801455	0.109444						C5	I	VU	M	I	M																				A12	0.680462		A2
C4	0.642123	0.749166	0.208978	0.261332	0.186248	0.245906			C4	0.454352	0.437815	1.05744	1.09462	0.706932	0.0965361						C6	UI	VI	VI	VU	M																				A13	0.643152		A3
C5	0.642123	0.749166	0.208978	0.261332	0.186248	0.245906			C5	0.454352	0.437815	1.05744	1.09462	0.706932	0.0965361						C7	UI	VI	VU	VU	I																				A14	0.673362		A4
C6	0.67623	0.817017	0.199248	0.253985	0.167418	0.235296			C6	0.415398	0.391606	1.09095	1.14752	0.735015	0.100371						C8	UI	VI	VU	VU	I																				A15	0.642325		A5
C7	0.632669	0.767098	0.227164	0.285676	0.195073	0.266109			C7	0.473908	0.454608	1.0487	1.09938	0.698201	0.0953438						C9	M	M	M	I	I																							A6
C8	0.632669	0.767098	0.227164	0.285676	0.195073	0.266109			C8	0.473908	0.454608	1.0487	1.09938	0.698201	0.0953438						C10	M	M	M	I	UI																							A7
C9	0.662277	0.767338	0.181128	0.231019	0.182322	0.234748			C9	0.424389	0.403247	1.06771	1.10806	0.724434	0.0989261																																		A8
C10	0.627022	0.728055	0.19675	0.249052	0.211727	0.267802			C10	0.471859	0.45574	1.02628	1.06217	0.692445	0.0945578																																		A9
														sum	SUM	1																																	A10
														7.32299																																			A11
																																																	A12
																																																	A13
																																																	A14
																																																	A15
Alternatives	Experts
		C1						C2						C3						C4						C5						C6						C7						C8
		MD (L)	MD (U)	AD (L)	AD (U)	NMD(L)	NMD(U)	MD (L)	MD (U)	AD (L)	AD (U)	NMD(L)	NMD(U)	MD (L)	MD (U)	AD (L)	AD (U)	NMD(L)	NMD(U)	MD (L)	MD (U)	AD (L)	AD (U)	NMD(L)	NMD(U)	MD (L)	MD (U)	AD (L)	AD (U)	NMD(L)	NMD(U)	MD (L)	MD (U)	AD (L)	AD (U)	NMD(L)	NMD(U)	MD (L)	MD (U)	AD (L)	AD (U)	NMD(L)	NMD(U)	MD (L)	MD (U)	AD (L)	AD (U)	NMD(L)	NMD(U)
A1	DM1	0.35	0.45	0.25	0.3	0.3	0.35	0.55	0.65	0.15	0.2	0.2	0.25	0.65	0.75	0.1	0.15	0.15	0.2	0.35	0.45	0.25	0.3	0.3	0.35	0.45	0.55	0.2	0.25	0.25	0.3	0.15	0.25	0.35	0.4	0.4	0.45	0.55	0.65	0.15	0.2	0.2	0.25	0.85	0.95	0	0.05	0.05	0.1
	DM2	0.75	0.85	0.05	0.1	0.1	0.15	0.25	0.35	0.3	0.35	0.35	0.4	0.45	0.55	0.2	0.25	0.25	0.3	0.35	0.45	0.25	0.3	0.3	0.35	0.85	0.95	0	0.05	0.05	0.1	0.15	0.25	0.35	0.4	0.4	0.45	0.55	0.65	0.15	0.2	0.2	0.25	0.15	0.25	0.35	0.4	0.4	0.45
	DM3	0.75	0.85	0.05	0.1	0.1	0.15	0.25	0.35	0.3	0.35	0.35	0.4	0.45	0.55	0.2	0.25	0.25	0.3	0.35	0.45	0.25	0.3	0.3	0.35	0.85	0.95	0	0.05	0.05	0.1	0.15	0.25	0.35	0.4	0.4	0.45	0.55	0.65	0.15	0.2	0.2	0.25	0.15	0.25	0.35	0.4	0.4	0.45
	DM4	0.75	0.85	0.05	0.1	0.1	0.15	0.25	0.35	0.3	0.35	0.35	0.4	0.55	0.65	0.15	0.2	0.2	0.25	0.15	0.25	0.35	0.4	0.4	0.45	0.85	0.95	0	0.05	0.05	0.1	0.15	0.25	0.35	0.4	0.4	0.45	0.55	0.65	0.15	0.2	0.2	0.25	0.15	0.25	0.35	0.4	0.4	0.45
	DM5	0.45	0.55	0.2	0.25	0.25	0.3	0.25	0.35	0.3	0.35	0.35	0.4	0.85	0.95	0	0.05	0.05	0.1	0.75	0.85	0.05	0.1	0.1	0.15	0.25	0.35	0.3	0.35	0.35	0.4	0.15	0.25	0.35	0.4	0.4	0.45	0.55	0.65	0.15	0.2	0.2	0.25	0.15	0.25	0.35	0.4	0.4	0.45
A1	Aggregated	0.65848	0.767146	0.0908227	0.149814	0.149759	0.204501	0.365987	0.459999	0.24913	0.303298	0.301244	0.354667	0.611839	0.737587	0	0.168272	0.171091	0.224177	0.415431	0.53189	0.222547	0.406158	0.280743	0.330071	0.757723	0.885041	0	0.0980291	0.097096	0.159576	0.15	0.25	0.35	0.4	0.4	0.45	0.55	0.65	0.15	0.2	0.2	0.25	0.550027	0.688984	0	0.23493	0.229074	0.306225
A2	DM1	0.25	0.35	0.3	0.35	0.35	0.4	0.15	0.25	0.35	0.4	0.4	0.45	0.25	0.35	0.3	0.35	0.35	0.4	0.85	0.95	0	0.05	0.05	0.1	0.45	0.55	0.2	0.25	0.25	0.3	0.85	0.95	0	0.05	0.05	0.1	0	0.05	0.45	0.5	0.5	0.55	0.15	0.25	0.35	0.4	0.4	0.45
	DM2	0.25	0.35	0.3	0.35	0.35	0.4	0.15	0.25	0.35	0.4	0.4	0.45	0.25	0.35	0.3	0.35	0.35	0.4	0.55	0.65	0.15	0.2	0.2	0.25	0.25	0.35	0.3	0.35	0.35	0.4	0.55	0.65	0.15	0.2	0.2	0.25	0.35	0.45	0.25	0.3	0.3	0.35	0.15	0.25	0.35	0.4	0.4	0.45
	DM3	0.25	0.35	0.3	0.35	0.35	0.4	0.15	0.25	0.35	0.4	0.4	0.45	0.25	0.35	0.3	0.35	0.35	0.4	0.55	0.65	0.15	0.2	0.2	0.25	0.25	0.35	0.3	0.35	0.35	0.4	0.55	0.65	0.15	0.2	0.2	0.25	0.35	0.45	0.25	0.3	0.3	0.35	0.15	0.25	0.35	0.4	0.4	0.45
	DM4	0.25	0.35	0.3	0.35	0.35	0.4	0.15	0.25	0.35	0.4	0.4	0.45	0.25	0.35	0.3	0.35	0.35	0.4	0.55	0.65	0.15	0.2	0.2	0.25	0.25	0.35	0.3	0.35	0.35	0.4	0.55	0.65	0.15	0.2	0.2	0.25	0.35	0.45	0.25	0.3	0.3	0.35	0.15	0.25	0.35	0.4	0.4	0.45
	DM5	0.45	0.55	0.2	0.25	0.25	0.3	0.25	0.35	0.3	0.35	0.35	0.4	0.85	0.95	0	0.05	0.05	0.1	0.75	0.85	0.05	0.1	0.1	0.15	0.25	0.35	0.3	0.35	0.35	0.4	0.15	0.25	0.35	0.4	0.4	0.45	0.55	0.65	0.15	0.2	0.2	0.25	0.15	0.25	0.35	0.4	0.4	0.45
A2	Aggregated	0.28359	0.386191	0.285828	0.334535	0.336223	0.38484	0.165416	0.266066	0.34362	0.39289	0.393676	0.442937	0.435067	0.588847	0	0.269504	0.277462	0.332046	0.696198	0.817334	0	0.199711	0.126973	0.18463	0.319808	0.415416	0.269103	0.321122	0.319813	0.371608	0.657874	0.780428	0	0.15395	0.14982	0.213985	0.340263	0.437406	0.275354	0.323778	0.327773	0.375559	0.15	0.25	0.373313	0.4	0.4	0.45
A3	DM1	0.05	0.15	0.4	0.45	0.45	0.5	0.45	0.55	0.2	0.25	0.25	0.3	0.55	0.65	0.15	0.2	0.2	0.25	0.75	0.85	0.05	0.1	0.1	0.15	0.55	0.65	0.15	0.2	0.2	0.25	0.25	0.35	0.3	0.35	0.35	0.4	0.65	0.75	0.1	0.15	0.15	0.2	0.25	0.35	0.3	0.35	0.35	0.4
	DM2	0.05	0.15	0.4	0.45	0.45	0.5	0.45	0.55	0.2	0.25	0.25	0.3	0.55	0.65	0.15	0.2	0.2	0.25	0.65	0.75	0.1	0.15	0.15	0.2	0.55	0.65	0.15	0.2	0.2	0.25	0.25	0.35	0.3	0.35	0.35	0.4	0.45	0.55	0.2	0.25	0.25	0.3	0	0.05	0.45	0.5	0.5	0.55
	DM3	0.05	0.15	0.4	0.45	0.45	0.5	0.45	0.55	0.2	0.25	0.25	0.3	0.55	0.65	0.15	0.2	0.2	0.25	0.65	0.75	0.1	0.15	0.15	0.2	0.55	0.65	0.15	0.2	0.2	0.25	0.25	0.35	0.3	0.35	0.35	0.4	0.45	0.55	0.2	0.25	0.25	0.3	0	0.05	0.45	0.5	0.5	0.55
	DM4	0.05	0.15	0.4	0.45	0.45	0.5	0.45	0.55	0.2	0.25	0.25	0.3	0.55	0.65	0.15	0.2	0.2	0.25	0.65	0.75	0.1	0.15	0.15	0.2	0.55	0.65	0.15	0.2	0.2	0.25	0.25	0.35	0.3	0.35	0.35	0.4	0.45	0.55	0.2	0.25	0.25	0.3	0	0.05	0.45	0.5	0.5	0.55
	DM5	0.45	0.55	0.2	0.25	0.25	0.3	0.25	0.35	0.3	0.35	0.35	0.4	0.85	0.95	0	0.05	0.05	0.1	0.75	0.85	0.05	0.1	0.1	0.15	0.25	0.35	0.3	0.35	0.35	0.4	0.15	0.25	0.35	0.4	0.4	0.45	0.55	0.65	0.15	0.2	0.2	0.25	0.15	0.25	0.35	0.4	0.4	0.45
A3	Aggregated	0.16967	0.256552	0.368241	0.415841	0.419513	0.466846	0.432384	0.529772	0.209917	0.261557	0.260244	0.311818	0.612502	0.738396	0	0.166023	0.169501	0.221052	0.693824	0.79606	0.0764499	0.205072	0.128195	0.178762	0.526728	0.623796	0.162937	0.215611	0.213814	0.26629	0.240444	0.33863	0.305571	0.356334	0.355623	0.406378	0.529343	0.629667	0.160481	0.212887	0.212278	0.263889	0.140774	0.206638	0.181106	0.442906	0.442466	0.493473
A4	DM1	0.45	0.55	0.2	0.25	0.25	0.3	0.25	0.35	0.3	0.35	0.35	0.4	0.85	0.95	0	0.05	0.05	0.1	0.75	0.85	0.05	0.1	0.1	0.15	0.25	0.35	0.3	0.35	0.35	0.4	0.15	0.25	0.35	0.4	0.4	0.45	0.55	0.65	0.15	0.2	0.2	0.25	0.15	0.25	0.35	0.4	0.4	0.45
	DM2	0.45	0.55	0.2	0.25	0.25	0.3	0.25	0.35	0.3	0.35	0.35	0.4	0.65	0.75	0.1	0.15	0.15	0.2	0.75	0.85	0.05	0.1	0.1	0.15	0.25	0.35	0.3	0.35	0.35	0.4	0.15	0.25	0.35	0.4	0.4	0.45	0.55	0.65	0.15	0.2	0.2	0.25	0.85	0.95	0	0.05	0.05	0.1
	DM3	0.45	0.55	0.2	0.25	0.25	0.3	0.25	0.35	0.3	0.35	0.35	0.4	0.65	0.75	0.1	0.15	0.15	0.2	0.75	0.85	0.05	0.1	0.1	0.15	0.25	0.35	0.3	0.35	0.35	0.4	0.15	0.25	0.35	0.4	0.4	0.45	0.55	0.65	0.15	0.2	0.2	0.25	0.85	0.95	0	0.05	0.05	0.1
	DM4	0.35	0.45	0.25	0.3	0.3	0.35	0.25	0.35	0.3	0.35	0.35	0.4	0.65	0.75	0.1	0.15	0.15	0.2	0.75	0.85	0.05	0.1	0.1	0.15	0.25	0.35	0.3	0.35	0.35	0.4	0.15	0.25	0.35	0.4	0.4	0.45	0.55	0.65	0.15	0.2	0.2	0.25	0.85	0.95	0	0.05	0.05	0.1
	DM5	0.35	0.45	0.25	0.3	0.3	0.35	0.55	0.65	0.15	0.2	0.2	0.25	0.65	0.75	0.1	0.15	0.15	0.2	0.35	0.45	0.25	0.3	0.3	0.35	0.45	0.55	0.2	0.25	0.25	0.3	0.15	0.25	0.35	0.4	0.4	0.45	0.55	0.65	0.15	0.2	0.2	0.25	0.85	0.95	0	0.05	0.05	0.1
A4	Aggregated	0.419282	0.518301	0.215982	0.26666	0.266207	0.316818	0.308239	0.412852	0.27618	0.324658	0.327387	0.37553	0.724918	0.837892	0	0.113236	0.111736	0.16749	0.724296	0.82476	0.0605889	0.165783	0.114011	0.168079	0.28359	0.386191	0.285828	0.334535	0.336223	0.38484	0.15	0.25	0.35	0.4	0.4	0.45	0.55	0.65	0.15	0.2	0.2	0.25	0.78172	0.908841	0	0.0851316	0.0873081	0.146951
A5	DM1	0.75	0.85	0.05	0.1	0.1	0.15	0.25	0.35	0.3	0.35	0.35	0.4	0.45	0.55	0.2	0.25	0.25	0.3	0.35	0.45	0.25	0.3	0.3	0.35	0.85	0.95	0	0.05	0.05	0.1	0.15	0.25	0.35	0.4	0.4	0.45	0.65	0.75	0.1	0.15	0.15	0.2	0.15	0.25	0.35	0.4	0.4	0.45
	DM2	0.75	0.85	0.05	0.1	0.1	0.15	0.25	0.35	0.3	0.35	0.35	0.4	0.45	0.55	0.2	0.25	0.25	0.3	0.35	0.45	0.25	0.3	0.3	0.35	0.85	0.95	0	0.05	0.05	0.1	0.15	0.25	0.35	0.4	0.4	0.45	0.55	0.65	0.15	0.2	0.2	0.25	0.15	0.25	0.35	0.4	0.4	0.45
	DM3	0.75	0.85	0.05	0.1	0.1	0.15	0.25	0.35	0.3	0.35	0.35	0.4	0.45	0.55	0.2	0.25	0.25	0.3	0.35	0.45	0.25	0.3	0.3	0.35	0.85	0.95	0	0.05	0.05	0.1	0.15	0.25	0.35	0.4	0.4	0.45	0.55	0.65	0.15	0.2	0.2	0.25	0.15	0.25	0.35	0.4	0.4	0.45
	DM4	0.75	0.85	0.05	0.1	0.1	0.15	0.25	0.35	0.3	0.35	0.35	0.4	0.55	0.65	0.15	0.2	0.2	0.25	0.15	0.25	0.35	0.4	0.4	0.45	0.85	0.95	0	0.05	0.05	0.1	0.15	0.25	0.35	0.4	0.4	0.45	0.55	0.65	0.15	0.2	0.2	0.25	0.15	0.25	0.35	0.4	0.4	0.45
	DM5	0.45	0.55	0.2	0.25	0.25	0.3	0.45	0.55	0.2	0.25	0.25	0.3	0.55	0.65	0.15	0.2	0.2	0.25	0.15	0.25	0.35	0.4	0.4	0.45	0.55	0.65	0.15	0.2	0.2	0.25	0	0.05	0.45	0.5	0.5	0.55	0.55	0.65	0.15	0.2	0.2	0.25	0.05	0.15	0.4	0.45	0.45	0.5
A5	Aggregated	0.72801	0.82821	0.0589966	0.113096	0.111556	0.164635	0.28359	0.386191	0.285828	0.334535	0.336223	0.38484	0.488339	0.589554	0.181128	0.231019	0.231501	0.281257	0.298763	0.39437	0.280727	0.406158	0.331257	0.38255	0.830802	0.936049	0	0.0602325	0.0589966	0.113096	0.14086	0.233787	0.360657	0.412169	0.410796	0.462293	0.580449	0.679786	0.134551	0.185804	0.185156	0.236123	0.141895	0.239216	0.32677	0.406378	0.405663	0.456413
A6	DM1	0.25	0.35	0.3	0.35	0.35	0.4	0.15	0.25	0.35	0.4	0.4	0.45	0.25	0.35	0.3	0.35	0.35	0.4	0.85	0.95	0	0.05	0.05	0.1	0.45	0.55	0.2	0.25	0.25	0.3	0.85	0.95	0	0.05	0.05	0.1	0	0.05	0.45	0.5	0.5	0.55	0.15	0.25	0.35	0.4	0.4	0.45
	DM2	0.25	0.35	0.3	0.35	0.35	0.4	0.15	0.25	0.35	0.4	0.4	0.45	0.25	0.35	0.3	0.35	0.35	0.4	0.55	0.65	0.15	0.2	0.2	0.25	0.25	0.35	0.3	0.35	0.35	0.4	0.55	0.65	0.15	0.2	0.2	0.25	0.35	0.45	0.25	0.3	0.3	0.35	0.15	0.25	0.35	0.4	0.4	0.45
	DM3	0.25	0.35	0.3	0.35	0.35	0.4	0.15	0.25	0.35	0.4	0.4	0.45	0.25	0.35	0.3	0.35	0.35	0.4	0.55	0.65	0.15	0.2	0.2	0.25	0.25	0.35	0.3	0.35	0.35	0.4	0.55	0.65	0.15	0.2	0.2	0.25	0.35	0.45	0.25	0.3	0.3	0.35	0.15	0.25	0.35	0.4	0.4	0.45
	DM4	0.25	0.35	0.3	0.35	0.35	0.4	0.15	0.25	0.35	0.4	0.4	0.45	0.25	0.35	0.3	0.35	0.35	0.4	0.55	0.65	0.15	0.2	0.2	0.25	0.25	0.35	0.3	0.35	0.35	0.4	0.55	0.65	0.15	0.2	0.2	0.25	0.35	0.45	0.25	0.3	0.3	0.35	0.15	0.25	0.35	0.4	0.4	0.45
	DM5	0.55	0.65	0.15	0.2	0.2	0.25	0.55	0.65	0.15	0.2	0.2	0.25	0.55	0.65	0.15	0.2	0.2	0.25	0.55	0.65	0.15	0.2	0.2	0.25	0.25	0.35	0.3	0.35	0.35	0.4	0.55	0.65	0.15	0.2	0.2	0.25	0.35	0.45	0.25	0.3	0.3	0.35	0.55	0.65	0.15	0.2	0.2	0.25
A6	Aggregated	0.308239	0.412852	0.27618	0.324658	0.327387	0.37553	0.247168	0.348659	0.316337	0.364443	0.368241	0.415841	0.308239	0.412852	0.27618	0.324658	0.327387	0.37553	0.674679	0.796051	0	0.199711	0.137924	0.197742	0.319808	0.415416	0.269103	0.321122	0.319813	0.371608	0.674679	0.796051	0	0.140265	0.137924	0.197742	0.302021	0.39433	0.292664	0.341899	0.344025	0.39292	0.247168	0.348659	0.344706	0.364443	0.368241	0.415841
A7	DM1	0.05	0.15	0.4	0.45	0.45	0.5	0.45	0.55	0.2	0.25	0.25	0.3	0.55	0.65	0.15	0.2	0.2	0.25	0.75	0.85	0.05	0.1	0.1	0.15	0.55	0.65	0.15	0.2	0.2	0.25	0.25	0.35	0.3	0.35	0.35	0.4	0.65	0.75	0.1	0.15	0.15	0.2	0.25	0.35	0.3	0.35	0.35	0.4
	DM2	0.05	0.15	0.4	0.45	0.45	0.5	0.45	0.55	0.2	0.25	0.25	0.3	0.55	0.65	0.15	0.2	0.2	0.25	0.65	0.75	0.1	0.15	0.15	0.2	0.55	0.65	0.15	0.2	0.2	0.25	0.25	0.35	0.3	0.35	0.35	0.4	0.45	0.55	0.2	0.25	0.25	0.3	0	0.05	0.45	0.5	0.5	0.55
	DM3	0.05	0.15	0.4	0.45	0.45	0.5	0.45	0.55	0.2	0.25	0.25	0.3	0.55	0.65	0.15	0.2	0.2	0.25	0.65	0.75	0.1	0.15	0.15	0.2	0.55	0.65	0.15	0.2	0.2	0.25	0.25	0.35	0.3	0.35	0.35	0.4	0.45	0.55	0.2	0.25	0.25	0.3	0	0.05	0.45	0.5	0.5	0.55
	DM4	0.05	0.15	0.4	0.45	0.45	0.5	0.45	0.55	0.2	0.25	0.25	0.3	0.55	0.65	0.15	0.2	0.2	0.25	0.65	0.75	0.1	0.15	0.15	0.2	0.55	0.65	0.15	0.2	0.2	0.25	0.25	0.35	0.3	0.35	0.35	0.4	0.45	0.55	0.2	0.25	0.25	0.3	0	0.05	0.45	0.5	0.5	0.55
	DM5	0.15	0.25	0.35	0.4	0.4	0.45	0.35	0.45	0.25	0.3	0.3	0.35	0.45	0.55	0.2	0.25	0.25	0.3	0.65	0.75	0.1	0.15	0.15	0.2	0.45	0.55	0.2	0.25	0.25	0.3	0.15	0.25	0.35	0.4	0.4	0.45	0.45	0.55	0.2	0.25	0.25	0.3	0	0.05	0.45	0.5	0.5	0.55
A7	Aggregated	0.0700598	0.167242	0.393676	0.442937	0.443718	0.492974	0.439715	0.538364	0.205398	0.256197	0.2555	0.306276	0.539682	0.63849	0.15524	0.206085	0.205398	0.256197	0.681116	0.781419	0.0830434	0.205072	0.134551	0.185804	0.539682	0.63849	0.15524	0.206085	0.205398	0.256197	0.240444	0.33863	0.305571	0.356334	0.355623	0.406378	0.518268	0.617238	0.166087	0.219363	0.218007	0.27043	0.130964	0.186253	0.177598	0.456381	0.454409	0.506953
A8	DM1	0.35	0.45	0.25	0.3	0.3	0.35	0.55	0.65	0.15	0.2	0.2	0.25	0.65	0.75	0.1	0.15	0.15	0.2	0.35	0.45	0.25	0.3	0.3	0.35	0.45	0.55	0.2	0.25	0.25	0.3	0.15	0.25	0.35	0.4	0.4	0.45	0.55	0.65	0.15	0.2	0.2	0.25	0.85	0.95	0	0.05	0.05	0.1
	DM2	0.45	0.55	0.2	0.25	0.25	0.3	0.25	0.35	0.3	0.35	0.35	0.4	0.65	0.75	0.1	0.15	0.15	0.2	0.75	0.85	0.05	0.1	0.1	0.15	0.25	0.35	0.3	0.35	0.35	0.4	0.15	0.25	0.35	0.4	0.4	0.45	0.55	0.65	0.15	0.2	0.2	0.25	0.85	0.95	0	0.05	0.05	0.1
	DM3	0.45	0.55	0.2	0.25	0.25	0.3	0.25	0.35	0.3	0.35	0.35	0.4	0.65	0.75	0.1	0.15	0.15	0.2	0.75	0.85	0.05	0.1	0.1	0.15	0.25	0.35	0.3	0.35	0.35	0.4	0.15	0.25	0.35	0.4	0.4	0.45	0.55	0.65	0.15	0.2	0.2	0.25	0.85	0.95	0	0.05	0.05	0.1
	DM4	0.35	0.45	0.25	0.3	0.3	0.35	0.25	0.35	0.3	0.35	0.35	0.4	0.65	0.75	0.1	0.15	0.15	0.2	0.75	0.85	0.05	0.1	0.1	0.15	0.25	0.35	0.3	0.35	0.35	0.4	0.15	0.25	0.35	0.4	0.4	0.45	0.55	0.65	0.15	0.2	0.2	0.25	0.85	0.95	0	0.05	0.05	0.1
	DM5	0.35	0.45	0.25	0.3	0.3	0.35	0.55	0.65	0.15	0.2	0.2	0.25	0.65	0.75	0.1	0.15	0.15	0.2	0.35	0.45	0.25	0.3	0.3	0.35	0.45	0.55	0.2	0.25	0.25	0.3	0.15	0.25	0.35	0.4	0.4	0.45	0.55	0.65	0.15	0.2	0.2	0.25	0.85	0.95	0	0.05	0.05	0.1
A8	Aggregated	0.392942	0.493076	0.229296	0.279397	0.279541	0.329567	0.404944	0.504656	0.22935	0.281337	0.281781	0.332971	0.65	0.75	0.1	0.15	0.15	0.2	0.653526	0.762261	0.093274	0.219607	0.153054	0.208779	0.3456	0.444628	0.25639	0.306934	0.307225	0.357524	0.15	0.25	0.35	0.4	0.4	0.45	0.55	0.65	0.15	0.2	0.2	0.25	0.85	0.95	0	0.05	0.05	0.1
A9	DM1	0.75	0.85	0.05	0.1	0.1	0.15	0.25	0.35	0.3	0.35	0.35	0.4	0.45	0.55	0.2	0.25	0.25	0.3	0.35	0.45	0.25	0.3	0.3	0.35	0.85	0.95	0	0.05	0.05	0.1	0.15	0.25	0.35	0.4	0.4	0.45	0.65	0.75	0.1	0.15	0.15	0.2	0.15	0.25	0.35	0.4	0.4	0.45
	DM2	0.75	0.85	0.05	0.1	0.1	0.15	0.25	0.35	0.3	0.35	0.35	0.4	0.45	0.55	0.2	0.25	0.25	0.3	0.35	0.45	0.25	0.3	0.3	0.35	0.85	0.95	0	0.05	0.05	0.1	0.15	0.25	0.35	0.4	0.4	0.45	0.55	0.65	0.15	0.2	0.2	0.25	0.15	0.25	0.35	0.4	0.4	0.45
	DM3	0.75	0.85	0.05	0.1	0.1	0.15	0.25	0.35	0.3	0.35	0.35	0.4	0.45	0.55	0.2	0.25	0.25	0.3	0.35	0.45	0.25	0.3	0.3	0.35	0.85	0.95	0	0.05	0.05	0.1	0.15	0.25	0.35	0.4	0.4	0.45	0.55	0.65	0.15	0.2	0.2	0.25	0.15	0.25	0.35	0.4	0.4	0.45
	DM4	0.75	0.85	0.05	0.1	0.1	0.15	0.25	0.35	0.3	0.35	0.35	0.4	0.55	0.65	0.15	0.2	0.2	0.25	0.15	0.25	0.35	0.4	0.4	0.45	0.85	0.95	0	0.05	0.05	0.1	0.15	0.25	0.35	0.4	0.4	0.45	0.55	0.65	0.15	0.2	0.2	0.25	0.15	0.25	0.35	0.4	0.4	0.45
	DM5	0.45	0.55	0.2	0.25	0.25	0.3	0.25	0.35	0.3	0.35	0.35	0.4	0.85	0.95	0	0.05	0.05	0.1	0.75	0.85	0.05	0.1	0.1	0.15	0.25	0.35	0.3	0.35	0.35	0.4	0.15	0.25	0.35	0.4	0.4	0.45	0.55	0.65	0.15	0.2	0.2	0.25	0.15	0.25	0.35	0.4	0.4	0.45
A9	Aggregated	0.72801	0.82821	0.0589966	0.113096	0.111556	0.164635	0.25	0.35	0.3	0.35	0.35	0.4	0.56374	0.697299	0	0.191773	0.196198	0.248689	0.415431	0.53189	0.222547	0.406158	0.280743	0.330071	0.824077	0.932219	0	0.0649341	0.0630716	0.120465	0.15	0.25	0.35	0.4	0.4	0.45	0.580449	0.679786	0.134551	0.185804	0.185156	0.236123	0.15	0.25	0.3567	0.4	0.4	0.45
A10	DM1	0.25	0.35	0.3	0.35	0.35	0.4	0.15	0.25	0.35	0.4	0.4	0.45	0.25	0.35	0.3	0.35	0.35	0.4	0.85	0.95	0	0.05	0.05	0.1	0.45	0.55	0.2	0.25	0.25	0.3	0.85	0.95	0	0.05	0.05	0.1	0	0.05	0.45	0.5	0.5	0.55	0.15	0.25	0.35	0.4	0.4	0.45
	DM2	0.25	0.35	0.3	0.35	0.35	0.4	0.15	0.25	0.35	0.4	0.4	0.45	0.25	0.35	0.3	0.35	0.35	0.4	0.55	0.65	0.15	0.2	0.2	0.25	0.25	0.35	0.3	0.35	0.35	0.4	0.55	0.65	0.15	0.2	0.2	0.25	0.35	0.45	0.25	0.3	0.3	0.35	0.15	0.25	0.35	0.4	0.4	0.45
	DM3	0.25	0.35	0.3	0.35	0.35	0.4	0.15	0.25	0.35	0.4	0.4	0.45	0.25	0.35	0.3	0.35	0.35	0.4	0.55	0.65	0.15	0.2	0.2	0.25	0.25	0.35	0.3	0.35	0.35	0.4	0.55	0.65	0.15	0.2	0.2	0.25	0.35	0.45	0.25	0.3	0.3	0.35	0.15	0.25	0.35	0.4	0.4	0.45
	DM4	0.25	0.35	0.3	0.35	0.35	0.4	0.15	0.25	0.35	0.4	0.4	0.45	0.25	0.35	0.3	0.35	0.35	0.4	0.55	0.65	0.15	0.2	0.2	0.25	0.25	0.35	0.3	0.35	0.35	0.4	0.55	0.65	0.15	0.2	0.2	0.25	0.35	0.45	0.25	0.3	0.3	0.35	0.15	0.25	0.35	0.4	0.4	0.45
	DM5	0.45	0.55	0.2	0.25	0.25	0.3	0.25	0.35	0.3	0.35	0.35	0.4	0.85	0.95	0	0.05	0.05	0.1	0.75	0.85	0.05	0.1	0.1	0.15	0.25	0.35	0.3	0.35	0.35	0.4	0.15	0.25	0.35	0.4	0.4	0.45	0.55	0.65	0.15	0.2	0.2	0.25	0.15	0.25	0.35	0.4	0.4	0.45
A10	Aggregated	0.28359	0.386191	0.285828	0.334535	0.336223	0.38484	0.165416	0.266066	0.34362	0.39289	0.393676	0.442937	0.435067	0.588847	0	0.269504	0.277462	0.332046	0.696198	0.817334	0	0.199711	0.126973	0.18463	0.319808	0.415416	0.269103	0.321122	0.319813	0.371608	0.657874	0.780428	0	0.15395	0.14982	0.213985	0.340263	0.437406	0.275354	0.323778	0.327773	0.375559	0.15	0.25	0.321604	0.4	0.4	0.45
A11	DM1	0.75	0.85	0.05	0.1	0.1	0.15	0.25	0.35	0.3	0.35	0.35	0.4	0.55	0.65	0.15	0.2	0.2	0.25	0.15	0.25	0.35	0.4	0.4	0.45	0.85	0.95	0	0.05	0.05	0.1	0.15	0.25	0.35	0.4	0.4	0.45	0.55	0.65	0.15	0.2	0.2	0.25	0.15	0.25	0.35	0.4	0.4	0.45
	DM2	0.25	0.35	0.3	0.35	0.35	0.4	0.15	0.25	0.35	0.4	0.4	0.45	0.25	0.35	0.3	0.35	0.35	0.4	0.55	0.65	0.15	0.2	0.2	0.25	0.25	0.35	0.3	0.35	0.35	0.4	0.55	0.65	0.15	0.2	0.2	0.25	0.35	0.45	0.25	0.3	0.3	0.35	0.15	0.25	0.35	0.4	0.4	0.45
	DM3	0.25	0.35	0.3	0.35	0.35	0.4	0.15	0.25	0.35	0.4	0.4	0.45	0.25	0.35	0.3	0.35	0.35	0.4	0.55	0.65	0.15	0.2	0.2	0.25	0.25	0.35	0.3	0.35	0.35	0.4	0.55	0.65	0.15	0.2	0.2	0.25	0.35	0.45	0.25	0.3	0.3	0.35	0.15	0.25	0.35	0.4	0.4	0.45
	DM4	0.25	0.35	0.3	0.35	0.35	0.4	0.15	0.25	0.35	0.4	0.4	0.45	0.25	0.35	0.3	0.35	0.35	0.4	0.55	0.65	0.15	0.2	0.2	0.25	0.25	0.35	0.3	0.35	0.35	0.4	0.55	0.65	0.15	0.2	0.2	0.25	0.35	0.45	0.25	0.3	0.3	0.35	0.15	0.25	0.35	0.4	0.4	0.45
	DM5	0.55	0.65	0.15	0.2	0.2	0.25	0.55	0.65	0.15	0.2	0.2	0.25	0.55	0.65	0.15	0.2	0.2	0.25	0.55	0.65	0.15	0.2	0.2	0.25	0.25	0.35	0.3	0.35	0.35	0.4	0.55	0.65	0.15	0.2	0.2	0.25	0.35	0.45	0.25	0.3	0.3	0.35	0.55	0.65	0.15	0.2	0.2	0.25
A11	Aggregated	0.512091	0.618178	0.170844	0.235606	0.234001	0.292166	0.267486	0.369198	0.303531	0.352199	0.355293	0.403493	0.404944	0.504656	0.22935	0.281337	0.281781	0.332971	0.486266	0.588441	0.188249	0.340034	0.240838	0.290583	0.568802	0.707054	0	0.21271	0.207744	0.28053	0.486266	0.588441	0.188249	0.23882	0.240838	0.290583	0.418179	0.51549	0.218007	0.27043	0.269103	0.321122	0.247168	0.348659	0.363781	0.364443	0.368241	0.415841
A12	DM1	0.75	0.85	0.05	0.1	0.1	0.15	0.25	0.35	0.3	0.35	0.35	0.4	0.55	0.65	0.15	0.2	0.2	0.25	0.15	0.25	0.35	0.4	0.4	0.45	0.85	0.95	0	0.05	0.05	0.1	0.15	0.25	0.35	0.4	0.4	0.45	0.55	0.65	0.15	0.2	0.2	0.25	0.15	0.25	0.35	0.4	0.4	0.45
	DM2	0.05	0.15	0.4	0.45	0.45	0.5	0.45	0.55	0.2	0.25	0.25	0.3	0.55	0.65	0.15	0.2	0.2	0.25	0.65	0.75	0.1	0.15	0.15	0.2	0.55	0.65	0.15	0.2	0.2	0.25	0.25	0.35	0.3	0.35	0.35	0.4	0.45	0.55	0.2	0.25	0.25	0.3	0	0.05	0.45	0.5	0.5	0.55
	DM3	0.05	0.15	0.4	0.45	0.45	0.5	0.45	0.55	0.2	0.25	0.25	0.3	0.55	0.65	0.15	0.2	0.2	0.25	0.65	0.75	0.1	0.15	0.15	0.2	0.55	0.65	0.15	0.2	0.2	0.25	0.25	0.35	0.3	0.35	0.35	0.4	0.45	0.55	0.2	0.25	0.25	0.3	0	0.05	0.45	0.5	0.5	0.55
	DM4	0.05	0.15	0.4	0.45	0.45	0.5	0.45	0.55	0.2	0.25	0.25	0.3	0.55	0.65	0.15	0.2	0.2	0.25	0.65	0.75	0.1	0.15	0.15	0.2	0.55	0.65	0.15	0.2	0.2	0.25	0.25	0.35	0.3	0.35	0.35	0.4	0.45	0.55	0.2	0.25	0.25	0.3	0	0.05	0.45	0.5	0.5	0.55
	DM5	0.15	0.25	0.35	0.4	0.4	0.45	0.35	0.45	0.25	0.3	0.3	0.35	0.45	0.55	0.2	0.25	0.25	0.3	0.65	0.75	0.1	0.15	0.15	0.2	0.45	0.55	0.2	0.25	0.25	0.3	0.15	0.25	0.35	0.4	0.4	0.45	0.45	0.55	0.2	0.25	0.25	0.3	0	0.05	0.45	0.5	0.5	0.55
A12	Aggregated	0.449625	0.543828	0.225452	0.301419	0.296487	0.36225	0.396998	0.496851	0.228981	0.279236	0.279616	0.329676	0.539682	0.63849	0.15524	0.206085	0.205398	0.256197	0.578792	0.684307	0.139909	0.292407	0.195109	0.246128	0.668139	0.790121	0	0.144532	0.141647	0.202644	0.217259	0.315527	0.318462	0.368721	0.368583	0.418814	0.480244	0.579137	0.185156	0.236123	0.235484	0.286324	0.0779854	0.13495	0.214686	0.472246	0.470969	0.522467
A13	DM1	0.75	0.85	0.05	0.1	0.1	0.15	0.25	0.35	0.3	0.35	0.35	0.4	0.55	0.65	0.15	0.2	0.2	0.25	0.15	0.25	0.35	0.4	0.4	0.45	0.85	0.95	0	0.05	0.05	0.1	0.15	0.25	0.35	0.4	0.4	0.45	0.55	0.65	0.15	0.2	0.2	0.25	0.15	0.25	0.35	0.4	0.4	0.45
	DM2	0.45	0.55	0.2	0.25	0.25	0.3	0.25	0.35	0.3	0.35	0.35	0.4	0.65	0.75	0.1	0.15	0.15	0.2	0.75	0.85	0.05	0.1	0.1	0.15	0.25	0.35	0.3	0.35	0.35	0.4	0.15	0.25	0.35	0.4	0.4	0.45	0.55	0.65	0.15	0.2	0.2	0.25	0.85	0.95	0	0.05	0.05	0.1
	DM3	0.45	0.55	0.2	0.25	0.25	0.3	0.25	0.35	0.3	0.35	0.35	0.4	0.65	0.75	0.1	0.15	0.15	0.2	0.75	0.85	0.05	0.1	0.1	0.15	0.25	0.35	0.3	0.35	0.35	0.4	0.15	0.25	0.35	0.4	0.4	0.45	0.55	0.65	0.15	0.2	0.2	0.25	0.85	0.95	0	0.05	0.05	0.1
	DM4	0.35	0.45	0.25	0.3	0.3	0.35	0.25	0.35	0.3	0.35	0.35	0.4	0.65	0.75	0.1	0.15	0.15	0.2	0.75	0.85	0.05	0.1	0.1	0.15	0.25	0.35	0.3	0.35	0.35	0.4	0.15	0.25	0.35	0.4	0.4	0.45	0.55	0.65	0.15	0.2	0.2	0.25	0.85	0.95	0	0.05	0.05	0.1
	DM5	0.35	0.45	0.25	0.3	0.3	0.35	0.55	0.65	0.15	0.2	0.2	0.25	0.65	0.75	0.1	0.15	0.15	0.2	0.35	0.45	0.25	0.3	0.3	0.35	0.45	0.55	0.2	0.25	0.25	0.3	0.15	0.25	0.35	0.4	0.4	0.45	0.55	0.65	0.15	0.2	0.2	0.25	0.85	0.95	0	0.05	0.05	0.1
A13	Aggregated	0.546191	0.649856	0.148946	0.210919	0.208232	0.26532	0.308239	0.412852	0.27618	0.324658	0.327387	0.37553	0.626515	0.728206	0.111482	0.16146	0.162025	0.211754	0.640532	0.750558	0.102078	0.236386	0.165324	0.222648	0.58006	0.717711	0	0.203312	0.199567	0.269898	0.15	0.25	0.35	0.4	0.4	0.45	0.55	0.65	0.15	0.2	0.2	0.25	0.78172	0.908841	0	0.0851316	0.0873081	0.146951
A14	DM1	0.75	0.85	0.05	0.1	0.1	0.15	0.25	0.35	0.3	0.35	0.35	0.4	0.55	0.65	0.15	0.2	0.2	0.25	0.15	0.25	0.35	0.4	0.4	0.45	0.85	0.95	0	0.05	0.05	0.1	0.15	0.25	0.35	0.4	0.4	0.45	0.55	0.65	0.15	0.2	0.2	0.25	0.15	0.25	0.35	0.4	0.4	0.45
	DM2	0.75	0.85	0.05	0.1	0.1	0.15	0.25	0.35	0.3	0.35	0.35	0.4	0.45	0.55	0.2	0.25	0.25	0.3	0.35	0.45	0.25	0.3	0.3	0.35	0.85	0.95	0	0.05	0.05	0.1	0.15	0.25	0.35	0.4	0.4	0.45	0.55	0.65	0.15	0.2	0.2	0.25	0.15	0.25	0.35	0.4	0.4	0.45
	DM3	0.75	0.85	0.05	0.1	0.1	0.15	0.25	0.35	0.3	0.35	0.35	0.4	0.45	0.55	0.2	0.25	0.25	0.3	0.35	0.45	0.25	0.3	0.3	0.35	0.85	0.95	0	0.05	0.05	0.1	0.15	0.25	0.35	0.4	0.4	0.45	0.55	0.65	0.15	0.2	0.2	0.25	0.15	0.25	0.35	0.4	0.4	0.45
	DM4	0.75	0.85	0.05	0.1	0.1	0.15	0.25	0.35	0.3	0.35	0.35	0.4	0.55	0.65	0.15	0.2	0.2	0.25	0.15	0.25	0.35	0.4	0.4	0.45	0.85	0.95	0	0.05	0.05	0.1	0.15	0.25	0.35	0.4	0.4	0.45	0.55	0.65	0.15	0.2	0.2	0.25	0.15	0.25	0.35	0.4	0.4	0.45
	DM5	0.45	0.55	0.2	0.25	0.25	0.3	0.25	0.35	0.3	0.35	0.35	0.4	0.85	0.95	0	0.05	0.05	0.1	0.75	0.85	0.05	0.1	0.1	0.15	0.25	0.35	0.3	0.35	0.35	0.4	0.15	0.25	0.35	0.4	0.4	0.45	0.55	0.65	0.15	0.2	0.2	0.25	0.15	0.25	0.35	0.4	0.4	0.45
A14	Aggregated	0.72801	0.82821	0.0589966	0.113096	0.111556	0.164635	0.25	0.35	0.3	0.35	0.35	0.4	0.584696	0.714464	0	0.181128	0.184807	0.237352	0.385092	0.502595	0.243552	0.437189	0.30325	0.351998	0.824077	0.932219	0	0.0649341	0.0630716	0.120465	0.15	0.25	0.35	0.4	0.4	0.45	0.55	0.65	0.15	0.2	0.2	0.25	0.15	0.25	0.3567	0.4	0.4	0.45
A15	DM1	0.75	0.85	0.05	0.1	0.1	0.15	0.25	0.35	0.3	0.35	0.35	0.4	0.55	0.65	0.15	0.2	0.2	0.25	0.15	0.25	0.35	0.4	0.4	0.45	0.85	0.95	0	0.05	0.05	0.1	0.15	0.25	0.35	0.4	0.4	0.45	0.55	0.65	0.15	0.2	0.2	0.25	0.15	0.25	0.35	0.4	0.4	0.45
	DM2	0.25	0.35	0.3	0.35	0.35	0.4	0.15	0.25	0.35	0.4	0.4	0.45	0.25	0.35	0.3	0.35	0.35	0.4	0.55	0.65	0.15	0.2	0.2	0.25	0.25	0.35	0.3	0.35	0.35	0.4	0.55	0.65	0.15	0.2	0.2	0.25	0.35	0.45	0.25	0.3	0.3	0.35	0.15	0.25	0.35	0.4	0.4	0.45
	DM3	0.25	0.35	0.3	0.35	0.35	0.4	0.15	0.25	0.35	0.4	0.4	0.45	0.25	0.35	0.3	0.35	0.35	0.4	0.55	0.65	0.15	0.2	0.2	0.25	0.25	0.35	0.3	0.35	0.35	0.4	0.55	0.65	0.15	0.2	0.2	0.25	0.35	0.45	0.25	0.3	0.3	0.35	0.15	0.25	0.35	0.4	0.4	0.45
	DM4	0.25	0.35	0.3	0.35	0.35	0.4	0.15	0.25	0.35	0.4	0.4	0.45	0.25	0.35	0.3	0.35	0.35	0.4	0.55	0.65	0.15	0.2	0.2	0.25	0.25	0.35	0.3	0.35	0.35	0.4	0.55	0.65	0.15	0.2	0.2	0.25	0.35	0.45	0.25	0.3	0.3	0.35	0.15	0.25	0.35	0.4	0.4	0.45
	DM5	0.45	0.55	0.2	0.25	0.25	0.3	0.25	0.35	0.3	0.35	0.35	0.4	0.85	0.95	0	0.05	0.05	0.1	0.75	0.85	0.05	0.1	0.1	0.15	0.25	0.35	0.3	0.35	0.35	0.4	0.15	0.25	0.35	0.4	0.4	0.45	0.55	0.65	0.15	0.2	0.2	0.25	0.15	0.25	0.35	0.4	0.4	0.45
A15	Aggregated	0.500345	0.605208	0.176812	0.242774	0.240316	0.299409	0.195436	0.293917	0.32971	0.379691	0.379833	0.429785	0.501066	0.642706	0	0.233543	0.238811	0.294415	0.527066	0.638394	0.165115	0.340034	0.221716	0.271315	0.568802	0.707054	0	0.21271	0.207744	0.28053	0.452847	0.549825	0.208281	0.26212	0.261609	0.314452	0.444044	0.544868	0.205113	0.256097	0.25639	0.306934	0.15	0.25	0.313387	0.4	0.4	0.45
Aggregated
	C1						C2						C3						C4						C5						C6						C7						C8						C9
	MD (L)	MD (U)	AD (L)	AD (U)	NMD(L)	NMD(U)	MD (L)	MD (U)	AD (L)	AD (U)	NMD(L)	NMD(U)	MD (L)	MD (U)	AD (L)	AD (U)	NMD(L)	NMD(U)	MD (L)	MD (U)	AD (L)	AD (U)	NMD(L)	NMD(U)	MD (L)	MD (U)	AD (L)	AD (U)	NMD(L)	NMD(U)	MD (L)	MD (U)	AD (L)	AD (U)	NMD(L)	NMD(U)	MD (L)	MD (U)	AD (L)	AD (U)	NMD(L)	NMD(U)	MD (L)	MD (U)	AD (L)	AD (U)	NMD(L)	NMD(U)	MD (L)
A1	0.65848	0.767146	0.0908227	0.149814	0.149759	0.204501	0.365987	0.459999	0.24913	0.303298	0.301244	0.354667	0.611839	0.737587	0	0.168272	0.171091	0.224177	0.415431	0.53189	0.222547	0.406158	0.280743	0.330071	0.757723	0.885041	0	0.0980291	0.097096	0.159576	0.15	0.25	0.35	0.4	0.4	0.45	0.55	0.65	0.15	0.2	0.2	0.25	0.550027	0.688984	0	0.23493	0.229074	0.306225	0.46252
A2	0.28359	0.386191	0.285828	0.334535	0.336223	0.38484	0.165416	0.266066	0.34362	0.39289	0.393676	0.442937	0.435067	0.588847	0	0.269504	0.277462	0.332046	0.696198	0.817334	0	0.199711	0.126973	0.18463	0.319808	0.415416	0.269103	0.321122	0.319813	0.371608	0.657874	0.780428	0	0.15395	0.14982	0.213985	0.340263	0.437406	0.275354	0.323778	0.327773	0.375559	0.15	0.25	0.373313	0.4	0.4	0.45	0.79727
A3	0.16967	0.256552	0.368241	0.415841	0.419513	0.466846	0.432384	0.529772	0.209917	0.261557	0.260244	0.311818	0.612502	0.738396	0	0.166023	0.169501	0.221052	0.693824	0.79606	0.0764499	0.205072	0.128195	0.178762	0.526728	0.623796	0.162937	0.215611	0.213814	0.26629	0.240444	0.33863	0.305571	0.356334	0.355623	0.406378	0.529343	0.629667	0.160481	0.212887	0.212278	0.263889	0.140774	0.206638	0.181106	0.442906	0.442466	0.493473	0.365531
A4	0.419282	0.518301	0.215982	0.26666	0.266207	0.316818	0.308239	0.412852	0.27618	0.324658	0.327387	0.37553	0.724918	0.837892	0	0.113236	0.111736	0.16749	0.724296	0.82476	0.0605889	0.165783	0.114011	0.168079	0.28359	0.386191	0.285828	0.334535	0.336223	0.38484	0.15	0.25	0.35	0.4	0.4	0.45	0.55	0.65	0.15	0.2	0.2	0.25	0.78172	0.908841	0	0.0851316	0.0873081	0.146951	0.227906
A5	0.72801	0.82821	0.0589966	0.113096	0.111556	0.164635	0.28359	0.386191	0.285828	0.334535	0.336223	0.38484	0.488339	0.589554	0.181128	0.231019	0.231501	0.281257	0.298763	0.39437	0.280727	0.406158	0.331257	0.38255	0.830802	0.936049	0	0.0602325	0.0589966	0.113096	0.14086	0.233787	0.360657	0.412169	0.410796	0.462293	0.580449	0.679786	0.134551	0.185804	0.185156	0.236123	0.141895	0.239216	0.32677	0.406378	0.405663	0.456413	0.521398
A6	0.308239	0.412852	0.27618	0.324658	0.327387	0.37553	0.247168	0.348659	0.316337	0.364443	0.368241	0.415841	0.308239	0.412852	0.27618	0.324658	0.327387	0.37553	0.674679	0.796051	0	0.199711	0.137924	0.197742	0.319808	0.415416	0.269103	0.321122	0.319813	0.371608	0.674679	0.796051	0	0.140265	0.137924	0.197742	0.302021	0.39433	0.292664	0.341899	0.344025	0.39292	0.247168	0.348659	0.344706	0.364443	0.368241	0.415841	0.828542
A7	0.0700598	0.167242	0.393676	0.442937	0.443718	0.492974	0.439715	0.538364	0.205398	0.256197	0.2555	0.306276	0.539682	0.63849	0.15524	0.206085	0.205398	0.256197	0.681116	0.781419	0.0830434	0.205072	0.134551	0.185804	0.539682	0.63849	0.15524	0.206085	0.205398	0.256197	0.240444	0.33863	0.305571	0.356334	0.355623	0.406378	0.518268	0.617238	0.166087	0.219363	0.218007	0.27043	0.130964	0.186253	0.177598	0.456381	0.454409	0.506953	0.380395
A8	0.392942	0.493076	0.229296	0.279397	0.279541	0.329567	0.404944	0.504656	0.22935	0.281337	0.281781	0.332971	0.65	0.75	0.1	0.15	0.15	0.2	0.653526	0.762261	0.093274	0.219607	0.153054	0.208779	0.3456	0.444628	0.25639	0.306934	0.307225	0.357524	0.15	0.25	0.35	0.4	0.4	0.45	0.55	0.65	0.15	0.2	0.2	0.25	0.85	0.95	0	0.05	0.05	0.1	0.25
A9	0.72801	0.82821	0.0589966	0.113096	0.111556	0.164635	0.25	0.35	0.3	0.35	0.35	0.4	0.56374	0.697299	0	0.191773	0.196198	0.248689	0.415431	0.53189	0.222547	0.406158	0.280743	0.330071	0.824077	0.932219	0	0.0649341	0.0630716	0.120465	0.15	0.25	0.35	0.4	0.4	0.45	0.580449	0.679786	0.134551	0.185804	0.185156	0.236123	0.15	0.25	0.3567	0.4	0.4	0.45	0.523288
A10	0.28359	0.386191	0.285828	0.334535	0.336223	0.38484	0.165416	0.266066	0.34362	0.39289	0.393676	0.442937	0.435067	0.588847	0	0.269504	0.277462	0.332046	0.696198	0.817334	0	0.199711	0.126973	0.18463	0.319808	0.415416	0.269103	0.321122	0.319813	0.371608	0.657874	0.780428	0	0.15395	0.14982	0.213985	0.340263	0.437406	0.275354	0.323778	0.327773	0.375559	0.15	0.25	0.321604	0.4	0.4	0.45	0.79727
A11	0.512091	0.618178	0.170844	0.235606	0.234001	0.292166	0.267486	0.369198	0.303531	0.352199	0.355293	0.403493	0.404944	0.504656	0.22935	0.281337	0.281781	0.332971	0.486266	0.588441	0.188249	0.340034	0.240838	0.290583	0.568802	0.707054	0	0.21271	0.207744	0.28053	0.486266	0.588441	0.188249	0.23882	0.240838	0.290583	0.418179	0.51549	0.218007	0.27043	0.269103	0.321122	0.247168	0.348659	0.363781	0.364443	0.368241	0.415841	0.802948
A12	0.449625	0.543828	0.225452	0.301419	0.296487	0.36225	0.396998	0.496851	0.228981	0.279236	0.279616	0.329676	0.539682	0.63849	0.15524	0.206085	0.205398	0.256197	0.578792	0.684307	0.139909	0.292407	0.195109	0.246128	0.668139	0.790121	0	0.144532	0.141647	0.202644	0.217259	0.315527	0.318462	0.368721	0.368583	0.418814	0.480244	0.579137	0.185156	0.236123	0.235484	0.286324	0.0779854	0.13495	0.214686	0.472246	0.470969	0.522467	0.418179
A13	0.546191	0.649856	0.148946	0.210919	0.208232	0.26532	0.308239	0.412852	0.27618	0.324658	0.327387	0.37553	0.626515	0.728206	0.111482	0.16146	0.162025	0.211754	0.640532	0.750558	0.102078	0.236386	0.165324	0.222648	0.58006	0.717711	0	0.203312	0.199567	0.269898	0.15	0.25	0.35	0.4	0.4	0.45	0.55	0.65	0.15	0.2	0.2	0.25	0.78172	0.908841	0	0.0851316	0.0873081	0.146951	0.365987
A14	0.72801	0.82821	0.0589966	0.113096	0.111556	0.164635	0.25	0.35	0.3	0.35	0.35	0.4	0.584696	0.714464	0	0.181128	0.184807	0.237352	0.385092	0.502595	0.243552	0.437189	0.30325	0.351998	0.824077	0.932219	0	0.0649341	0.0630716	0.120465	0.15	0.25	0.35	0.4	0.4	0.45	0.55	0.65	0.15	0.2	0.2	0.25	0.15	0.25	0.3567	0.4	0.4	0.45	0.523288
A15	0.500345	0.605208	0.176812	0.242774	0.240316	0.299409	0.195436	0.293917	0.32971	0.379691	0.379833	0.429785	0.501066	0.642706	0	0.233543	0.238811	0.294415	0.527066	0.638394	0.165115	0.340034	0.221716	0.271315	0.568802	0.707054	0	0.21271	0.207744	0.28053	0.452847	0.549825	0.208281	0.26212	0.261609	0.314452	0.444044	0.544868	0.205113	0.256097	0.25639	0.306934	0.15	0.25	0.313387	0.4	0.4	0.45	0.766233
IVSF DM Alternatives
	C1					C2					C3					C4					C5					C6					C7					C8					C9					C10
	D+L	D+U	D-L	D-U	CW	D+L	D+U	D-L	D-U	CW	D+L	D+U	D-L	D-U	CW	D+L	D+U	D-L	D-U	CW	D+L	D+U	D-L	D-U	CW	D+L	D+U	D-L	D-U	CW	D+L	D+U	D-L	D-U	CW	D+L	D+U	D-L	D-U	CW	D+L	D+U	D-L	D-U	CW	D+L	D+U	D-L	D-U
A1	0.383813	0.344218	1.07924	1.11525	0.750889	0.74484	0.713709	0.827207	0.848553	0.534651	0.424194	0.383968	1.03026	1.08363	0.723427	0.685613	0.702167	0.859907	0.946929	0.565588	0.261009	0.219749	1.17872	1.22443	0.833296	1.0025	0.961769	0.710634	0.724569	0.422184	0.514782	0.474342	0.982344	1.01242	0.668512	0.504927	0.495679	0.947025	1.00559	0.661182	0.626527	0.59206	0.901529	0.927928	0.600207	0.542781	0.514483	0.956265	0.983635
A2	0.841419	0.797983	0.776351	0.799675	0.490145	0.984676	0.942982	0.716286	0.73176	0.428961	0.629392	0.59324	0.843412	0.930342	0.591964	0.329269	0.327627	1.11663	1.17164	0.776958	0.798347	0.763512	0.79834	0.818881	0.508707	0.373492	0.343077	1.07499	1.1183	0.753744	0.786452	0.749926	0.802177	0.828301	0.514857	1.01087	0.961769	0.722401	0.724569	0.423139	0.216921	0.181227	1.21953	1.25715	0.861506	1.10302	1.06429	0.685083	0.693713
A3	1.00052	0.971382	0.708064	0.723184	0.420566	0.658771	0.621898	0.88219	0.907009	0.582826	0.422949	0.38061	1.03193	1.08607	0.724956	0.340621	0.340003	1.11682	1.16198	0.770014	0.544289	0.50885	0.96025	0.986884	0.648985	0.892618	0.854123	0.752601	0.770734	0.465841	0.540679	0.5021	0.96253	0.991797	0.652071	0.983283	1.03397	0.602877	0.703871	0.393125	0.741662	0.7073	0.830532	0.852124	0.537312	0.808139	0.775718	0.79285	0.812119
A4	0.67435	0.635228	0.872294	0.898043	0.574801	0.813629	0.768875	0.789744	0.815973	0.503641	0.296909	0.259142	1.14652	1.18657	0.807538	0.304437	0.294013	1.14597	1.18313	0.79558	0.841419	0.797983	0.776351	0.799675	0.490145	1.0025	0.961769	0.710634	0.724569	0.422184	0.514782	0.474342	0.982344	1.01242	0.668512	0.235094	0.192748	1.2017	1.24937	0.851388	0.908557	0.867653	0.745504	0.764295	0.459463	0.705514	0.665284	0.851501	0.878815
A5	0.29984	0.263452	1.15014	1.18176	0.805438	0.841419	0.797983	0.776351	0.799675	0.490145	0.590082	0.548581	0.928372	0.957881	0.623572	0.824787	0.823466	0.7844	0.837697	0.496001	0.179189	0.143207	1.25528	1.2909	0.887611	1.01831	0.985232	0.705036	0.716707	0.415073	0.477922	0.439106	1.00945	1.0393	0.690797	1.00384	0.975832	0.692928	0.719621	0.416409	0.555055	0.525785	0.951134	0.975227	0.640583	0.419995	0.390718	1.04961	1.07815
A6	0.813629	0.768875	0.789744	0.815973	0.503641	0.895783	0.854393	0.748519	0.771766	0.464854	0.813629	0.768875	0.789744	0.815973	0.503641	0.353351	0.347248	1.0947	1.14769	0.761943	0.798347	0.763512	0.79834	0.818881	0.508707	0.353351	0.316814	1.0947	1.13885	0.769205	0.831373	0.798822	0.779212	0.800585	0.49215	0.90619	0.854393	0.760943	0.771766	0.465403	0.181722	0.142168	1.25287	1.29096	0.887057	0.95771	0.928571	0.721584	0.740604
A7	1.10302	1.06429	0.685083	0.693713	0.38882	0.649144	0.610369	0.888717	0.914727	0.588792	0.527428	0.488669	0.97301	1.00169	0.660259	0.355932	0.352641	1.10445	1.14699	0.760619	0.527428	0.488669	0.97301	1.00169	0.660259	0.892618	0.854123	0.752601	0.770734	0.465841	0.554236	0.517455	0.952732	0.980497	0.643354	0.99662	1.06182	0.588526	0.697186	0.384465	0.721791	0.683149	0.842847	0.866975	0.548942	0.808139	0.775718	0.79285	0.812119
A8	0.706568	0.66607	0.852081	0.877877	0.557584	0.697204	0.659838	0.855815	0.882471	0.561584	0.3937	0.353553	1.07471	1.1068	0.744857	0.390089	0.385144	1.07383	1.1204	0.738932	0.767047	0.728334	0.815545	0.839451	0.525333	1.0025	0.961769	0.710634	0.724569	0.422184	0.514782	0.474342	0.982344	1.01242	0.668512	0.158114	0.122474	1.27475	1.30958	0.902061	0.880341	0.839643	0.758288	0.777817	0.471764	0.636396	0.595819	0.897218	0.924662
A9	0.29984	0.263452	1.15014	1.18176	0.805438	0.880341	0.839643	0.758288	0.777817	0.471764	0.478348	0.436178	0.981784	1.04282	0.688845	0.685613	0.702167	0.859907	0.946929	0.565588	0.186887	0.152717	1.24777	1.28329	0.881698	1.0025	0.961769	0.710634	0.724569	0.422184	0.477922	0.439106	1.00945	1.0393	0.690797	1.00486	0.961769	0.713957	0.724569	0.422456	0.549541	0.515968	0.956072	0.981822	0.645233	0.428925	0.403001	1.04169	1.06892
A10	0.841419	0.797983	0.776351	0.799675	0.490145	0.984676	0.942982	0.716286	0.73176	0.428961	0.629392	0.59324	0.843412	0.930342	0.591964	0.329269	0.327627	1.11663	1.17164	0.776958	0.798347	0.763512	0.79834	0.818881	0.508707	0.373492	0.343077	1.07499	1.1183	0.753744	0.786452	0.749926	0.802177	0.828301	0.514857	0.99294	0.961769	0.697086	0.724569	0.421061	0.216921	0.181227	1.21953	1.25715	0.861506	1.10302	1.06429	0.685083	0.693713
A11	0.567449	0.535406	0.937113	0.968856	0.63346	0.868873	0.827503	0.761136	0.784966	0.476827	0.697204	0.659838	0.855815	0.882471	0.561584	0.597798	0.607818	0.920988	0.982425	0.612221	0.478632	0.457996	0.975298	1.03093	0.681728	0.597798	0.557543	0.920988	0.95214	0.618507	0.677096	0.641095	0.869834	0.89428	0.572336	0.913616	0.854393	0.769772	0.771766	0.465785	0.209967	0.165761	1.22677	1.27063	0.869227	0.869512	0.839434	0.759149	0.780416
A12	0.664564	0.655875	0.864825	0.890689	0.570722	0.703014	0.663188	0.853811	0.879868	0.559273	0.527428	0.488669	0.97301	1.00169	0.660259	0.484828	0.495725	1.00121	1.05929	0.677562	0.360826	0.325582	1.08774	1.13179	0.763792	0.92193	0.883099	0.739802	0.757159	0.453351	0.599902	0.561125	0.921629	0.94894	0.617025	1.05736	1.11548	0.576234	0.68503	0.367276	0.677096	0.641095	0.869834	0.89428	0.572336	0.854439	0.818471	0.770085	0.78879
A13	0.521045	0.487322	0.973348	1.00327	0.662187	0.813629	0.768875	0.789744	0.815973	0.503641	0.422103	0.380501	1.05221	1.08521	0.727008	0.408619	0.409478	1.05706	1.10612	0.725589	0.464948	0.440304	0.988515	1.04379	0.691835	1.0025	0.961769	0.710634	0.724569	0.422184	0.514782	0.474342	0.982344	1.01242	0.668512	0.235094	0.192748	1.2017	1.24937	0.851388	0.74484	0.713709	0.827207	0.848553	0.534651	0.665614	0.623968	0.877928	0.905554
A14	0.29984	0.263452	1.15014	1.18176	0.805438	0.880341	0.839643	0.758288	0.777817	0.471764	0.454567	0.413127	1.0032	1.06061	0.704011	0.727591	0.749966	0.832511	0.929324	0.543878	0.186887	0.152717	1.24777	1.28329	0.881698	1.0025	0.961769	0.710634	0.724569	0.422184	0.514782	0.474342	0.982344	1.01242	0.668512	1.00486	0.961769	0.713957	0.724569	0.422456	0.549541	0.515968	0.956072	0.981822	0.645233	0.565647	0.537358	0.939107	0.967162
A15	0.581953	0.551766	0.926675	0.957102	0.624285	0.948844	0.909634	0.729048	0.745451	0.442397	0.553142	0.518538	0.911304	0.98258	0.638625	0.547802	0.56568	0.954352	1.02672	0.64018	0.478632	0.457996	0.975298	1.03093	0.681728	0.641246	0.608477	0.890883	0.917055	0.591281	0.645673	0.605755	0.890057	0.918046	0.590974	0.990309	0.961769	0.693334	0.724569	0.420745	0.25156	0.212083	1.18739	1.23087	0.839119	0.961706	0.939752	0.722052	0.734344
Extended IVSF DM			C1 to C7 (Benefit)					C8 to C10 (Cost)				Normalized IVSF DM													Weighted IVSF DM
	C1	C2	C3	C4	C5	C6	C7	C8	C9	C10			C1	C2	C3	C4	C5	C6	C7	C8	C9	C10	0.106471			C1	C2	C3	C4	C5	C6	C7	C8	C9	C10
A1	0.750889	0.534651	0.723427	0.565588	0.833296	0.422184	0.668512	0.661182	0.600207	0.647245		A1	0.932274	0.908047	0.895842	0.710912	0.938808	0.548858	0.967741	1.03333	0.555484	0.765507	0.106471		A1	0.0992599	0.0966805	0.0980443	0.0686287	0.0906288	0.0550895	0.0922681	0.098522	0.0549518	0.0723847
A2	0.490145	0.428961	0.591964	0.776958	0.508707	0.753744	0.514857	0.423139	0.861506	0.38882		A2	0.608544	0.728545	0.733048	0.976593	0.57312	0.979901	0.745309	1.34173	0.867979	0.533325	0.109444		A2	0.0647922	0.0775688	0.0802275	0.0942765	0.0553267	0.0983536	0.0710606	0.127925	0.0858658	0.0504301
A3	0.420566	0.582826	0.724956	0.770014	0.648985	0.465841	0.652071	0.393125	0.537312	0.50331		A3	0.522157	0.989868	0.897736	0.967865	0.73116	0.605614	0.943941	1.05939	0.934247	0.855114	0.0965361		A3	0.0555945	0.105392	0.0982516	0.0934339	0.0705833	0.0607861	0.0899989	0.101006	0.0924214	0.0808576
A4	0.574801	0.503641	0.807538	0.79558	0.490145	0.422184	0.668512	0.851388	0.459463	0.557966		A4	0.713649	0.85538	1	1	0.552207	0.548858	0.967741	1.03333	0.431384	1	0.0965361		A4	0.0759828	0.091073	0.109444	0.0965361	0.0533079	0.0550895	0.0922681	0.098522	0.0426752	0.0945578
A5	0.805438	0.490145	0.623572	0.496001	0.887611	0.415073	0.690797	0.416409	0.640583	0.724105		A5	1	0.832459	0.772189	0.623446	1	0.539614	1	1	0.882007	0.717258	0.100371		A5	0.106471	0.0886326	0.0845112	0.060185	0.0965361	0.0541616	0.0953438	0.0953438	0.0872535	0.0678223
A6	0.503641	0.464854	0.503641	0.761943	0.508707	0.769205	0.49215	0.465403	0.887057	0.436674		A6	0.6253	0.789504	0.623674	0.95772	0.57312	1	0.712438	1.40363	0.789155	0.517963	0.0953438		A6	0.0665762	0.0840591	0.0682572	0.0924545	0.0553267	0.100371	0.0679265	0.133827	0.0780681	0.0489775
A7	0.38882	0.588792	0.660259	0.760619	0.660259	0.465841	0.643354	0.384465	0.548942	0.50331		A7	0.482743	1	0.817619	0.956055	0.743861	0.605614	0.931323	1.07374	0.95529	0.836998	0.0953438		A7	0.0513981	0.106471	0.0894833	0.0922938	0.0718094	0.0607861	0.0887958	0.102375	0.0945031	0.0791446
A8	0.557584	0.561584	0.744857	0.738932	0.525333	0.422184	0.668512	0.902061	0.471764	0.596537		A8	0.692274	0.95379	0.922379	0.928796	0.59185	0.548858	0.967741	1.03333	0.407152	0.973925	0.0989261		A8	0.073707	0.101551	0.100949	0.0896623	0.0571349	0.0550895	0.0922681	0.098522	0.0402779	0.0920922
A9	0.805438	0.471764	0.688845	0.565588	0.881698	0.422184	0.690797	0.422456	0.645233	0.717276		A9	1	0.801241	0.853018	0.710912	0.993339	0.548858	1	1	0.869382	0.712088	0.0945578		A9	0.106471	0.0853087	0.0933575	0.0686287	0.0958931	0.0550895	0.0953438	0.0953438	0.0860046	0.0673335
A10	0.490145	0.428961	0.591964	0.776958	0.508707	0.753744	0.514857	0.421061	0.861506	0.38882		A10	0.608544	0.728545	0.733048	0.976593	0.57312	0.979901	0.745309	1.34173	0.872262	0.533325			A10	0.0647922	0.0775688	0.0802275	0.0942765	0.0553267	0.0983536	0.0710606	0.127925	0.0862895	0.0504301
A11	0.63346	0.476827	0.561584	0.612221	0.681728	0.618507	0.572336	0.465785	0.869227	0.47393		A11	0.786478	0.80984	0.695427	0.769528	0.768048	0.804086	0.828516	1.20698	0.788509	0.528588			A11	0.083737	0.0862243	0.0761101	0.0742872	0.0741443	0.0807069	0.0789939	0.115078	0.0780041	0.0499821
A12	0.570722	0.559273	0.660259	0.677562	0.763792	0.453351	0.617025	0.367276	0.572336	0.482357		A12	0.708586	0.949865	0.817619	0.851657	0.860503	0.589377	0.893207	1.11956	1	0.802785			A12	0.0754437	0.101133	0.0894833	0.0822157	0.0830696	0.0591563	0.0851618	0.106743	0.0989261	0.0759096
A13	0.662187	0.503641	0.727008	0.725589	0.691835	0.422184	0.668512	0.851388	0.534651	0.58036		A13	0.822145	0.85538	0.900277	0.912024	0.779435	0.548858	0.967741	1.03333	0.431384	0.85937			A13	0.0875344	0.091073	0.0985297	0.0880432	0.0752436	0.0550895	0.0922681	0.098522	0.0426752	0.0812601
A14	0.805438	0.471764	0.704011	0.543878	0.881698	0.422184	0.668512	0.422456	0.645233	0.633465		A14	1	0.801241	0.871799	0.683625	0.993339	0.548858	0.967741	1.03333	0.869382	0.712088			A14	0.106471	0.0853087	0.0954129	0.0659945	0.0958931	0.0550895	0.0922681	0.098522	0.0860046	0.0673335
A15	0.624285	0.442397	0.638625	0.64018	0.681728	0.591281	0.590974	0.420745	0.839119	0.433728		A15	0.775087	0.751364	0.79083	0.80467	0.768048	0.768692	0.855496	1.16891	0.872917	0.547554			A15	0.0825241	0.0799983	0.0865514	0.0776797	0.0741443	0.0771544	0.0815662	0.111449	0.0863543	0.0517755
I	0.805438	0.588792	0.807538	0.79558	0.887611	0.769205	0.690797	0.367276	0.459463	0.38882		I	1	1	1	1	1	1	1	1	1	1			I	0.106471	0.106471	0.109444	0.0965361	0.0965361	0.100371	0.0953438	0.0953438	0.0989261	0.0945578	SUM	1
AI	0.38882	0.428961	0.503641	0.496001	0.490145	0.415073	0.49215	0.902061	0.887057	0.724105		AI	0.482743	0.728545	0.623674	0.623446	0.552207	0.539614	0.712438	1.40363	0.407152	0.517963			AI	0.0513981	0.0775688	0.0682572	0.060185	0.0533079	0.0541616	0.0679265	0.133827	0.0402779	0.0489775		0.655888
Final
	Si	Ki-	Ki+	f(Ki-)	f(Ki+)	f(Ki)	Rank
A1	0.826458	1.26006	0.826458	0.396094	0.603906	0.656027	7
A2	0.805827	1.2286	0.805827	0.396094	0.603906	0.63965	12
A3	0.848326	1.2934	0.848326	0.396094	0.603906	0.673385	3
A4	0.809456	1.23414	0.809456	0.396094	0.603906	0.642531	9
A5	0.836261	1.27501	0.836261	0.396094	0.603906	0.663808	6
A6	0.795844	1.21338	0.795844	0.396094	0.603906	0.631726	15
A7	0.83706	1.27622	0.83706	0.396094	0.603906	0.664442	5
A8	0.801253	1.22163	0.801253	0.396094	0.603906	0.63602	13
A9	0.848774	1.29408	0.848774	0.396094	0.603906	0.67374	2
A10	0.806251	1.22925	0.806251	0.396094	0.603906	0.639986	11
A11	0.797268	1.21555	0.797268	0.396094	0.603906	0.632856	14
A12	0.857242	1.30699	0.857242	0.396094	0.603906	0.680462	1
A13	0.810239	1.23533	0.810239	0.396094	0.603906	0.643152	8
A14	0.848298	1.29336	0.848298	0.396094	0.603906	0.673362	4
A15	0.809197	1.23374	0.809197	0.396094	0.603906	0.642325	10
[truncated: 25 more columns]
